# Supplementary material for: Computational Modeling Reveals Frequency Modulation of Calcium-cAMP/PKA Pathway in Dendritic Spines
Source: PubMed Central journal article supplement — Biophys J. 2019 Oct 9;117(10):1963–80. doi: 10.1016/j.bpj.2019.10.003 (PMC7031750; doi:10.1016/j.bpj.2019.10.003), 2019-10-09
Supplement: mmc1.pdf [file mmc1.pdf]

**Biophysical Journal, Volume 117**

**Supplemental Information**

**Computational Modeling Reveals Frequency Modulation of Calcium-cAMP/PKA Pathway in Dendritic Spines**

**Donya Ohadi, Danielle L. Schmitt, Barbara Calabrese, Shelley Halpain, Jin Zhang, and Padmini Rangamani**

## Reaction kinetic type selection for PDE1 activation

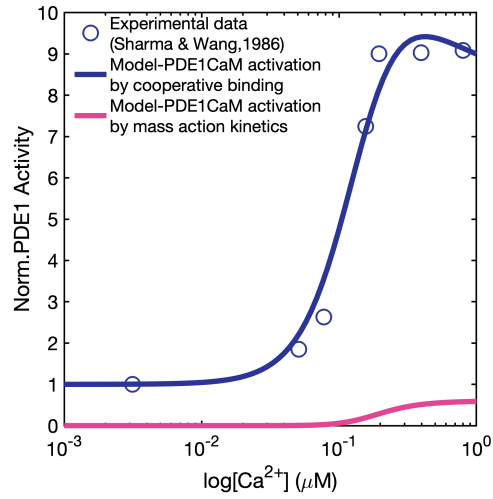

Figure S1: Cooperative binding kinetics shows a better fit for PDE1 activation by  $\text{Ca}^{2+}$  in comparison to mass-action kinetics.

## Stochastic vs Deterministic Simulations

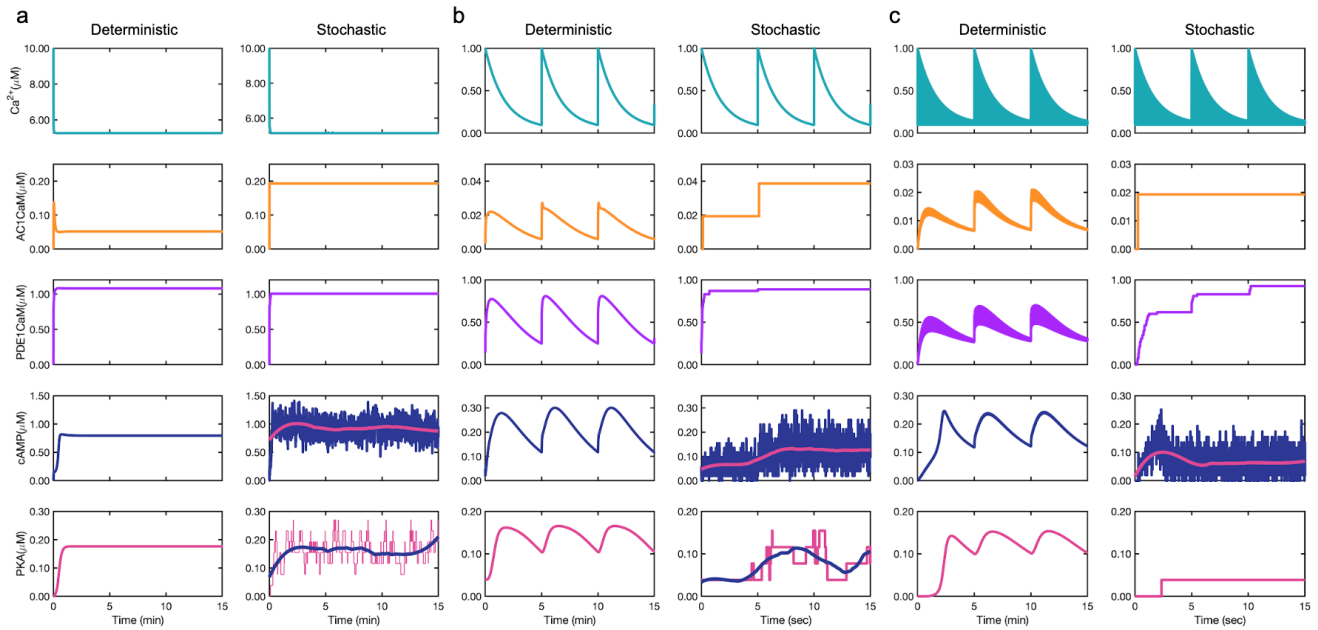

Figure S2: Comparison of stochastic and deterministic simulations for a) Non-oscillating  $\text{Ca}^{2+}$ , b)  $\text{Ca}^{2+}$  oscillating in minute scale, and c)  $\text{Ca}^{2+}$  oscillating in second scale.

## Effect of AC1 activation by $G_s$ on cAMP production

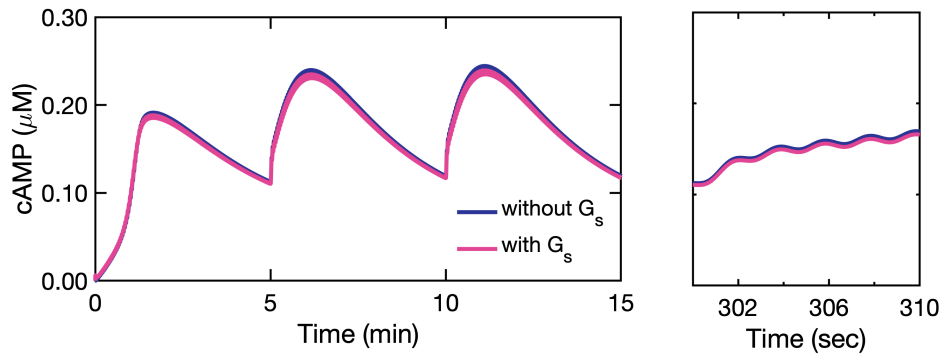

Figure S3: AC1 activation by  $G_s$  does not affect cAMP production.

## Other oscillation frequencies

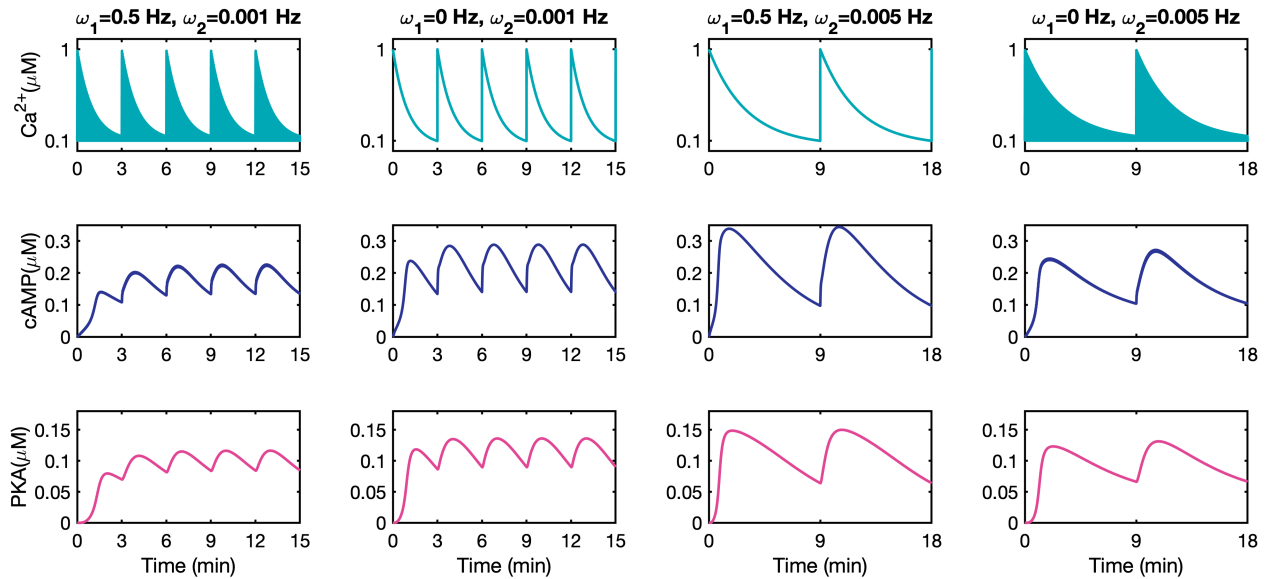

Figure S4: Two other calcium minute-scale frequencies ( $\omega_2=0.001$  and  $\omega_2=0.005$ ) along with second-scale oscillations ( $\omega_1=0.5$ ) were chosen to confirm that cAMP and PKA only pick up minute-scale oscillations of calcium.
