# Supplementary material for: Computational Modeling Reveals Frequency Modulation of Calcium-cAMP/PKA Pathway in Dendritic Spines
Source: PubMed Central journal article supplement — Biophys J. 2019 Oct 9;117(10):1963–80. doi: 10.1016/j.bpj.2019.10.003 (PMC7031750; doi:10.1016/j.bpj.2019.10.003), 2019-10-09
Supplement: mmc2.pdf [file mmc2.pdf]

# Computational Modeling Reveals Frequency Modulation of Calcium-cAMP/PKA Pathway in Dendritic Spines

Donya Ohadi,<sup>1</sup> Danielle L. Schmitt,<sup>2</sup> Barbara Calabrese,<sup>3</sup> Shelley Halpain,<sup>3</sup> Jin Zhang,<sup>2</sup> and Padmini Rangamani<sup>1,\*</sup>

<sup>1</sup>Department of Mechanical and Aerospace Engineering, <sup>2</sup>Department of Pharmacology, and <sup>3</sup>Division of Biological Sciences and Sanford Consortium for Regenerative Medicine, University of California San Diego, La Jolla, California

**ABSTRACT** Dendritic spines are the primary excitatory postsynaptic sites that act as subcompartments of signaling.  $\text{Ca}^{2+}$  is often the first and most rapid signal in spines. Downstream of calcium, the cyclic adenosine monophosphate (cAMP)/protein kinase A (PKA) pathway plays a critical role in the regulation of spine formation, morphological modifications, and ultimately, learning and memory. Although the dynamics of calcium are reasonably well-studied, calcium-induced cAMP/PKA dynamics, particularly with respect to frequency modulation, are not fully explored. In this study, we present a well-mixed model for the dynamics of calcium-induced cAMP/PKA dynamics in dendritic spines. The model is constrained using experimental observations in the literature. Further, we measured the calcium oscillation frequency in dendritic spines of cultured hippocampal CA1 neurons and used these dynamics as model inputs. Our model predicts that the various steps in this pathway act as frequency modulators for calcium, and the high frequency of calcium input is filtered by adenylyl cyclase 1 and phosphodiesterases in this pathway such that cAMP/PKA only responds to lower frequencies. This prediction has important implications for noise filtering and long-timescale signal transduction in dendritic spines. A companion manuscript presents a three-dimensional spatial model for the same pathway.

**SIGNIFICANCE** Cyclic adenosine monophosphate (cAMP)/protein kinase A (PKA) activity triggered by calcium is an essential biochemical pathway for synaptic plasticity, regulating spine structure, and long-term potentiation. In this study, we predicted that for a given calcium input, adenylyl cyclase 1 and phosphodiesterase 1 kinetics reflect both the high and the low frequencies with different amplitudes and cAMP/PKA acts as a leaky integrator of calcium because of frequency attenuation by the intermediary steps. These findings have implications for cAMP/PKA signaling in dendritic spines in particular and neuronal signal transduction in general.

## INTRODUCTION

Influence of  $\text{Ca}^{2+}$  in response to neurotransmitter-mediated ion channel opening is one of the first steps in synaptic plasticity (1,2). Transient high calcium elevation in postsynaptic domains results in the activation of multiple protein kinases, including calcium-calmodulin-dependent kinase II (CaMKII) and cyclic adenosine monophosphate (cAMP)-dependent protein kinase A (PKA) among others (3–8). These protein kinases are associated with long-term potentiation (LTP),

memory formation, consolidation, and retrieval and are known to have distinct roles in various aspects of these processes (see Table 1 in Giese and Mizuno (9)).

The dynamics of the protein kinases associated with LTP have been studied using systems biology approaches for more than two decades now (4,10–12). In 1999, a seminal work by Bhalla and Iyengar (13) highlighted the role of coupled signaling between PKA, CaMKII, and Mitogen-activated protein kinase (MAPK) and how they govern the emergent properties of signaling in neurons. Subsequently, Hayer and Bhalla (14) expanded this model to include trafficking of  $\alpha$ -amino-3-hydroxy-5-methyl-4-isoxazolepropionic acid (AMPA) receptors into the synapse and showed that the protein kinase activity and signaling cross

Submitted January 18, 2019, and accepted for publication October 2, 2019.

\*Correspondence: [padmini.rangamani@eng.ucsd.edu](mailto:padmini.rangamani@eng.ucsd.edu)

Editor: Eric Sobie.

<https://doi.org/10.1016/j.bpj.2019.10.003>

© 2019 Biophysical Society.

This is an open access article under the CC BY-NC-ND license (<http://creativecommons.org/licenses/by-nc-nd/4.0/>).

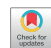

talk can affect trafficking dynamics. These models are examples of comprehensive pathway maps that account for the extensive detailed interactions between various biochemical components in neurons. Separately, detailed models for specific pathway components have also been developed. For example, the dynamics of CaMKII as a function of calcium influx have been well-studied both experimentally (15–17) and theoretically (18,19). These studies have established the role of CaMKII as a critical molecule in synaptic plasticity and the role played by CaMKII bistability in determining LTP versus long-term depression (LTD) (20–22).

Tightly coupled with calcium dynamics through various signaling pathways are the dynamics of another important second messenger, cAMP (23,24). Two types of enzymes play important roles in driving parallel  $\text{Ca}^{2+}$  and cAMP oscillations: adenylyl cyclases (ACs) and phosphodiesterases (PDEs) (25). ACs, which synthesize cAMP from ATP, are either directly or indirectly regulated by  $\text{Ca}^{2+}$  signaling. Different AC isoforms and their spatial organization in cells are thought to play an important role in regulating the spatio-temporal dynamics of cAMP (26). AC1 is an isoform of AC that is highly expressed in the brain and is directly activated by  $\text{Ca}^{2+}$  through the calcium-calmodulin complex. PDEs hydrolyze cAMP to AMP and are regulated by cAMP-dependent PKA activity downstream of cAMP (27,28). The isoforms PDE1 and PDE4 are highly expressed in the hippocampus and are modulated by the calcium-calmodulin complex and phosphorylation by PKA, respectively (29).

The primary effector of cAMP, PKA, is a heterotetrameric protein kinase consisting of two catalytic and two regulatory subunits. Postsynaptically, calcium influx through N-methyl-D-aspartate receptors (NMDARs) triggers the synthesis of cAMP by ACs and induces PKA activity. PKA activation plays an important role in LTP and LTD (30) and neurite outgrowth (31), resulting in memory formation (32) and emotional expression, among other cognitive processes (33). Within dendritic spines, PKA is enriched after stimulation of upstream signaling pathways (34,35) and structural plasticity (36). Spinal PKA activity has also been associated with maintenance of synaptic strength (35). Several mechanistic models have been developed to model cAMP signaling pathway dynamics (37–44). These models have investigated the mechanisms by which molecular components such as NMDARs and  $\beta$ -adrenergic receptors ( $\beta$ ARs) are involved in LTP through the cAMP pathway (43,44). Some others have studied localized cAMP signaling by PKA-mediated phosphorylation of PDE4 (40) or localization and colocalization of PKA by A-kinase-anchoring proteins in different subcellular domains (spine versus dendrite) (41,42). However, despite the critical role of PKA in signal transduction and physiological response within dendritic spines, little is known about how calcium-cAMP/PKA cross talk occurs in dendritic spines, particularly in response to periodic oscillations of calcium.

One of the interesting dynamical features of calcium influx into postsynaptic spines is the frequency of oscillations (45–47). Intracellular calcium oscillations ranging from seconds to minutes are known to be responsible for distinct physiological roles in the nervous system (48–51). Oscillatory gating dynamics of plasma-membrane-embedded channels or cyclic calcium release from intracellular stores can generate calcium spikes (23). Changes in the amplitude and frequency of these oscillating signals along with the intracellular concentrations of these second messengers can trigger diverse cellular responses in neurons (23,52–54). Studies have shown that calcium oscillates spontaneously in spines (55) and that CaMKII activity is sensitive to calcium frequency (56–60). Given these observations, we asked what, if any, are the relationships between  $\text{Ca}^{2+}$  frequency and cAMP/PKA dynamics? To answer this question, we built a mathematical model of calcium-induced cAMP/PKA dynamics that integrates key steps in the modulation of signaling components in the cAMP/PKA pathway. This model was constrained using experimental data available in the literature. Experimental measurements of calcium oscillations in dendritic spines show that calcium oscillates spontaneously in spines and these measurements are used to generate predictions of cAMP/PKA kinetics for different calcium inputs. Our model predicts that components in this pathway serve as frequency modulators of calcium dynamics such that cAMP/PKA only picks up the lower frequency of calcium influx; that is, cAMP/PKA is a leaky integrator of calcium dynamics. This finding sheds light on the kinetic mechanisms for robustness of cAMP/PKA responses in dendritic spines.

## MATERIALS AND METHODS

### Experimental methods

#### Plasmids

GCAMP6f was purchased from Addgene (Cambridge, MA).

#### Ethical approval

All animal experiments in this study were conducted in accordance with the National Institutes of Health Guide for the care and use of laboratory animals, and all protocols were approved by the University of California San Diego Institutional Animal Care and Use Committee. All surgical procedures were terminal, and isoflurane was used as an anesthetic to prevent any pain or discomfort.

#### Rat primary hippocampal neuron culture

Hippocampi were dissected from E19 Sprague-Dawley male and female rat pups (Charles River, Wilmington, MA) in ice-cold HEPES-buffered saline solution (Gibco, Gaithersburg, MD), supplemented with penicillin-streptomycin (Lifetech, Guangdong, China), glucose, and additional HEPES. Hippocampi were dissociated using papain (Worthington Biochemical, Lakewood, NJ). Cells were washed and resuspended in phenol-red-free Neurobasal Medium (Lifetech) supplemented with L-glutamine (Stem Cell Technologies, Vancouver, Canada) and SM1 (NeuroCult; Stem Cell Technologies). Mixed neuron and astrocyte cell suspension was plated at

a concentration of 200,000 cells/mL onto glass bottom 35 mm petri dishes (CellVis, Mountain View, CA) coated with poly-L-lysine (Sigma-Aldrich, St. Louis, MO). Cells were incubated in a humidified 37°C, CO<sub>2</sub> incubator (HeraCell, Thermo Fisher Scientific, Waltham, MA). At DIV (days in vitro) 20, cells were transfected with GCaMP6f using Lipofectamine 2000 (Invitrogen, Carlsbad, CA) for 48 h before imaging.

### Live-cell imaging

Neurons were imaged in standard medium using a resonant-scanning AIR confocal microscope (Nikon, Tokyo, Japan) equipped with a 60× 1.49 NA oil immersion objective, 489.1 nm laser, 525/50 nm emission filter, 488 dichroic, and DU4 GaASP detectors. Cells were kept at 37°C and 5% CO<sub>2</sub> using a stage-top incubation system (Okolab, Ambridge, PA). Images of basal calcium dynamics were acquired using NIS Elements AR 5.10.01 at four frames per second for 4–5 min. In all experiments, images were acquired using identical parameters and settings (laser excitation power, acquisition time, and time-lapse interval). We replicated the findings using at least three independent culture preparations.

### Identification of dendritic spines

Dendritic spines were selected from proximal and distal regions of dendrites. The images shown in Fig. 6 are portions of a dendrite image. For analysis, we selected only dendritic spines in which the head and neck, attached to the dendrite shaft, were visible in a single plane of focus, which was necessary to achieve sufficiently rapid image acquisition. Only experiments in which focus was perfectly maintained throughout the recording session were included in the time-lapse analyses. Dendritic spine selection was designed to minimize sampling bias by including approximately equal numbers of dendritic spines of different morphology, which was assessed on multiple planes of focus before starting the single-plane acquisition.

### Image analysis

The goal of the live-cell imaging data was to verify the existence of calcium oscillations in postsynaptic spines and to extract the frequency of calcium oscillations as input for the model to test model robustness. Initial image analysis was done using NIS Elements AR Analysis 5.10.01. To measure calcium in spines, images were deconvoluted in two dimensions using 20 iterations of blind deconvolution with medium noise. Individual spines were identified, and intensity was measured over time. Fluorescence

intensities were background-corrected by subtracting intensity from a region with no transfected cells from spine intensities and represented as  $\Delta F/F$ , where the minimal fluorescence intensity was subtracted from the instantaneous fluorescence intensity and divided by the minimal fluorescence intensity. Further processing was done using Microsoft Excel and MATLAB (The MathWorks, Natick, MA). Figure preparation was done using OMERO.

## Mathematical model development

To simulate the temporal dynamics of calcium-stimulated cAMP/PKA pathway in dendritic spines, we developed a well-mixed model that accounts for the dynamics of the different biochemical species shown in Fig. 1. Here, we list the model assumptions, identification of the key components in the pathway, and the governing equations.

### Model assumptions

#### Compartment size

We model the spine as a single compartment with a volume of 0.1 fL ( $10^{-16}$  L) based on the average volume of a single dendritic spine (61). All the biochemical species, including the membrane-bound ones, are well-mixed across this compartment. A separate spatial model is presented in (62).

#### Timescales

We focus on cAMP/PKA dynamics at the minute timescale. Calcium input was prescribed as sinusoidal functions with exponential decays based on experimental observations in the literature (63) and our experimental measurements. Different calcium inputs are described in detail below.

#### Reaction types

In general, the catalytic reactions such as enzymatic reactions, phosphorylation by protein kinases, and dephosphorylation by phosphatases are modeled using Michaelis-Menten kinetics. All other reactions are modeled using mass-action kinetics, assuming that the concentrations are present in large quantities. The binding reactions are modeled using either mass-action or cooperative kinetics. Catalytic reactions representing enzymatic

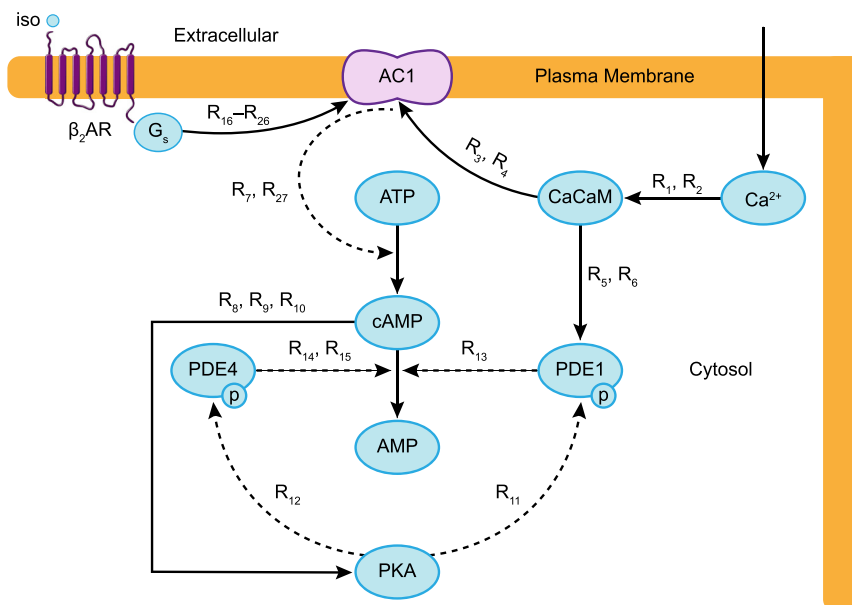

FIGURE 1 Schematic of the neuronal cAMP-PKA pathway. The main biochemical components in the pathway modeled are shown. Each arrow depicts the corresponding reactions between the different biochemical components of the model. Dashed arrows represent enzymatic reactions modeled using Michaelis-Menten kinetics, and solid arrows represent reactions modeled using mass action kinetics. The reaction numbers on each arrow correspond to the reactions listed in Table 1. To see this figure in color, go online.

activation or inhibition are modeled using Michaelis-Menten kinetics. For binding/unbinding reactions, we started with mass-action kinetics, and then if experimental data showed high nonlinearity or cooperativity, we used kinetic rates with higher nonlinearities (Fig. S1). For enzyme activations, especially the final step of activations, we used Michaelis-Menten kinetics. The reactions and corresponding reaction rates are given in Table 1.

### Enzyme regulations by calcium-calmodulin complex

We assumed that the enzymes regulated by calcium-calmodulin, AC1 and PDE1, are fully activated only when all four binding sites of calmodulin are bound by calcium ions (64,65). These fully activated enzymes are shown as AC1 • CaM (AC1 • Ca<sub>4</sub> • CaM) and PDE1 • CaM (PDE1 • Ca<sub>4</sub> • CaM).

### Kinetic parameters

Kinetic parameters for these reactions were estimated using the COPASI simulator (66) and are given in Table 2. The model was constrained such that dose-response curves from the simulations matched the experimentally reported dose-response curves. To estimate the model parameters, we primarily used data from brain tissues. For AC1 activation by Ca<sup>2+</sup>, we used mouse hippocampus data (67). For cAMP-ATP dynamics, data from mouse neuroblastoma (N18TG2 cells) were used (68). For PDE1 activation and PDE1/PKA phosphorylation, we used data from bovine brain (60 kDa) (69,70). In cases in which data from brain tissues were not available, we used other cell types. For example, for PDE4/PKA phosphorylation, we used data from SF9 cells (*Spodoptera frugiperda* Sf21 insect cells) (71). The vast majority of experimental data available in the literature are based on dose-response curves and steady-state data. We mostly found steady-state data to fit the parameters because time course data were not often available in the literature. Although kinetic parameters have not been fitted to time course data, the oscillation timescales and concentration levels have been considered by constraining the lower bound and upper bound of calculated parameters.

Based on these assumptions, we constructed a well-mixed model of the calcium-induced cAMP/PKA pathway in dendritic spines.

## Key components and governing equations of the model

The primary focus of this study is the regulation of cAMP by predominant Ca<sup>2+</sup>-sensitive isoforms of ACs and PDEs in the brain and, more specifically, in the hippocampus. The isoforms of AC expressed at high levels in rat brain are AC1, AC2, and AC5 (72). AC1 is predominantly found in the hippocampus and cerebellum, AC5 is restricted to the basal ganglia, and AC2 is more widely expressed but at much lower levels (72). The predominantly Ca<sup>2+</sup>/calmodulin-stimulated AC1 is selectively expressed in areas associated with learning and memory, including the cortex, hippocampus, and cerebellum. The Ca<sup>2+</sup>-inhibitible AC5 is exclusively expressed in striatal medium-sized neurons (72). Therefore, only AC1 has been considered in this model. Of all the 11 known members of the PDE family, only PDE1 and PDE4 are directly regulated by a rise in calcium (73). After identifying the key components of the cAMP pathway, using the existing experimental data in the literature, we designed the model using the following eight modules:

### Ca<sup>2+</sup>/CaM complex formation

Calcium can enter the spine through NMDAR-mediated influx at the plasma membrane or through the activation of ryanodine and IP<sub>3</sub> receptors from internal stores (74). Resting calcium is in the range of 0.05–0.1 μM and can rise to 10–100-fold when neurons are activated (75). Calmodulin is a small protein involved in the regulation of many calcium-dependent events (76–78). Calmodulin has two calcium-binding sites at each N-terminus and C-terminus

lobe with different Ca<sup>2+</sup> affinities (79). Calcium has a higher affinity for C-lobes than the N-lobes (80) but the N-lobe binds calcium faster (81). Based on these observations, we modeled the formation of the calcium-calmodulin complex using two sequential binding reactions with mass-action kinetics. For simplicity, we did not consider the cooperative binding within each of these individual lobes (82). Reaction 1 in Table 1 accounts for binding of the first two calcium ions to the C-lobe, resulting in the formation of Ca<sub>2</sub> • CaM, and reaction 2 in Table 1 accounts for the binding of third and fourth calcium ions to the N-lobe, resulting in the formation of Ca<sub>4</sub> • CaM. Kinetic parameters of these reactions (*kf*<sub>1</sub>, *kb*<sub>1</sub>, *kf*<sub>2</sub>, *kb*<sub>2</sub>) were obtained by fitting experimental data (80) to the model in COPASI (Fig. 2 A; Table 2).

### AC1 activation by Ca<sup>2+</sup>/CaM complex

Calcium-calmodulin-stimulated AC1 plays an important role in learning, memory formation, and LTP by coupling calcium activity to cAMP in neurons (83). Unlike other members of the AC family, AC1 is not stimulated by G<sub>s</sub>-coupled receptors unless it is activated by intracellular calcium (84). AC1 responds to NMDA-mediated calcium elevations (and not calcium released from intracellular stores) and is mostly located close to the post-synaptic densities of dendritic spines (85). AC1 is the predominant and neurospecific calcium-stimulated AC that is mostly expressed in dendrites and axons and at synapses (86). At very high concentrations of calcium (>10 μM), AC1 is inhibited (87). Our model takes this effect into account by fitting experimental data from (67) to the AC1 activity for steady-state Ca<sup>2+</sup> (Fig. 2 B). AC1 synthesizes cAMP from ATP and has been shown to be associated with hippocampal-dependent learning abilities (85). We modeled AC1 activation by calcium as a two-step process. First, AC1 binds to Ca<sub>2</sub> • CaM by mass-action kinetics to form AC1 • Ca<sub>2</sub> • CaM (reaction 3 in Table 1). Second, two other Ca<sup>2+</sup> ions bind to AC1 • Ca<sub>2</sub> • CaM in a cooperative binding reaction to form AC1 • Ca<sub>4</sub> • CaM (reaction 4 in Table 1). Only fully activated AC1 • Ca<sub>4</sub> • CaM can catalyze cAMP production. The first term in R<sub>4</sub> accounts for cooperative kinetics, whereas the second term accounts for basal degradation. As previously mentioned, the calcium/calmodulin binding in this study was simplified to two binding reactions: the first two calcium ions binding calmodulin and producing Ca<sub>2</sub> • CaM and then Ca<sub>2</sub> • CaM binding to two more calcium ions and producing Ca<sub>4</sub> • CaM. Based on Masada et al.'s (64) study showing AC1 is not activated by half-occupied calmodulin, we assumed that only the product of the second reaction (Ca<sub>4</sub> • CaM) can activate AC1. The parameters used in this module are listed in Table 2, and a comparison against experimental data is shown in Fig. 2 B.

### PDE1 activation by Ca<sup>2+</sup>/CaM complex

PDE1 is the other key enzyme that regulates calcium-cAMP interactions (65). PDE1A (the PDE1 subtype used in our model) is widely expressed at high levels in the hippocampus (88). PDE1 is the only type of PDE that is activated by calcium-calmodulin (89,90). PDE1 becomes activated by an increase in intracellular calcium level and has low cAMP affinity in comparison with other members of the PDE family (91). PDE1 isozymes show low cAMP affinities and low basal PDE1 activities. Based on the study by Sharma et al. (92), the isozymes function mainly during cell activations when both cAMP and Ca<sup>2+</sup> concentrations are elevated. The phosphorylation of PDE1A (brain 60 kDa PDE1) by PKA increases the calcium concentration required for activation of PDE1A by decreasing the enzyme's affinity for calmodulin (92). Unlike AC1, PDE1A does not discriminate between different sources of calcium (73). We modeled PDE1 activation by calcium as a two-step process: first, PDE1 binds to Ca<sub>2</sub> • CaM by mass-action kinetics to form PDE1 • Ca<sub>2</sub> • CaM (reaction 5 in Table 1). Second, two more Ca<sup>2+</sup> ions bind to PDE1 • Ca<sub>2</sub> • CaM in a cooperative binding reaction to form PDE1 • Ca<sub>4</sub> • CaM (reaction 6 in Table 1). Only fully activated PDE1 • Ca<sub>4</sub> • CaM can hydrolyze cAMP into AMP. The first term in R<sub>6</sub> accounts for cooperative kinetics, whereas the second term accounts for basal degradation. The parameters used in this module are listed in Table 2, and a comparison against experimental data from (69) is shown in Fig. 2 E.

**TABLE 1** cAMP-PKA Pathway Reactions, Reaction Types, and Reaction Rates Used in the Model

|                                                                      | List of Reactions                                                                                                                     | Reaction Type | Reaction Rate                                                                                                               |
|----------------------------------------------------------------------|---------------------------------------------------------------------------------------------------------------------------------------|---------------|-----------------------------------------------------------------------------------------------------------------------------|
| <b>Module 1: Ca<sup>2+</sup>-CaM Complex Formation</b>               |                                                                                                                                       |               |                                                                                                                             |
| 1                                                                    | $2Ca^{2+} + CaM \xrightleftharpoons[k_{b1}]{k_{f1}} Ca_2 \cdot CaM$                                                                   | MA            | $R = k_{f1}[Ca^{2+}]^2[CaM] - k_{b1}[Ca_2CaM]$                                                                              |
| 2                                                                    | $2Ca^{2+} + Ca_2 \cdot CaM \xrightleftharpoons[k_{b2}]{k_{f2}} Ca_4 \cdot CaM$                                                        | MA            | $R_2 = k_{f2}[Ca^{2+}]^2[Ca_2CaM] - k_{b2}[Ca_4CaM]$                                                                        |
| <b>Module 2: AC1 Activation by Ca<sup>2+</sup>-CaM Complex</b>       |                                                                                                                                       |               |                                                                                                                             |
| 3                                                                    | $AC1 + Ca_2 \cdot CaM \xrightleftharpoons[k_{b3}]{k_{f3}} AC1 \cdot Ca_2 \cdot CaM$                                                   | MA            | $R_3 = k_{f3}[AC1][Ca_2CaM] - k_{b3}[AC1Ca_2CaM]$                                                                           |
| 4                                                                    | $2Ca^{2+} + AC1 \cdot Ca_2 \cdot CaM \xrightleftharpoons[k_{b4}]{k_{f4}} AC1 \cdot Ca_4 \cdot CaM$                                    | CB            | $R_4 = (k_{f4}[AC1Ca_2CaM][Ca^{2+}]/K_{m4} + [Ca^{2+}]) - k_{b4}[AC1Ca_4CaM]$                                               |
| <b>Module 3: PDE1 Activation by Ca<sup>2+</sup>-CaM Complex</b>      |                                                                                                                                       |               |                                                                                                                             |
| 5                                                                    | $PDE1 + Ca_2 \cdot CaM \xrightleftharpoons[k_{b5}]{k_{f5}} PDE1 \cdot Ca_2 \cdot CaM$                                                 | MA            | $R_5 = k_{f5}[PDE1][Ca_2CaM] - k_{b5}[PDE1Ca_2CaM]$                                                                         |
| 6                                                                    | $2Ca^{2+} + PDE1 \cdot Ca_2 \cdot CaM \xrightleftharpoons[k_{b6}]{k_{f6}} PDE1 \cdot Ca_4 \cdot CaM$                                  | CB            | $R_6 = (k_{f6}[PDE1Ca_2CaM][Ca^{2+}]/K_{m6} + [Ca^{2+}]) - k_{b6}[PDE1Ca_4CaM]$                                             |
| <b>Module 4: cAMP Production</b>                                     |                                                                                                                                       |               |                                                                                                                             |
| 7                                                                    | $ATP + AC1 \cdot Ca_4 \cdot CaM \xrightarrow{K_{cat7}} cAMP$                                                                          | MM            | $R_7 = (K_{cat7}[AC1Ca_4CaM][ATP]/K_{m7} + [ATP]) - K_{r7}[cAMP]$                                                           |
| <b>Module 5: PKA Activation</b>                                      |                                                                                                                                       |               |                                                                                                                             |
| 8                                                                    | $R_2C_2 + 2cAMP \xrightleftharpoons[k_{b8}]{k_{f8}} R_2C_2 \cdot cAMP_2$                                                              | MA            | $R_8 = k_{f8}[R_2C_2][cAMP]^2 - k_{b8}[R_2C_2cAMP_2]$                                                                       |
| 9                                                                    | $R_2C_2 \cdot cAMP_2 + 2cAMP \xrightleftharpoons[k_{b9}]{k_{f9}} R_2C_2 \cdot cAMP_4$                                                 | MA            | $R_9 = k_{f9}[R_2C_2cAMP_2][cAMP]^2 - k_{b9}[R_2C_2cAMP_4]$                                                                 |
| 10                                                                   | $R_2C_2 \cdot cAMP_4 \xrightleftharpoons[k_{b10}]{k_{f10}} 2PKAc + R_2 \cdot cAMP_4$                                                  | MA            | $R_{10} = k_{f10}[R_2C_2cAMP_4] - k_{b10}[PKAc]^2[R_2cAMP_4]$                                                               |
| <b>Module 6: PDE Phosphorylation by PKA</b>                          |                                                                                                                                       |               |                                                                                                                             |
| 11                                                                   | $PDE1 + PKAc \xrightarrow{K_{cat11}} PDE1P$                                                                                           | MM            | $R_{11} = (K_{cat11}[PKAc][PDE1]/K_{m11} + [PDE1]) - K_{r11}[PDE1P]$                                                        |
| 12                                                                   | $PDE4 + PKAc \xrightarrow{K_{cat12}} PDE4P$                                                                                           | MM            | $R_{12} = (K_{cat12}[PKAc][PDE4]/K_{m12} + [PDE4]) - K_{r12}[PDE4P]$                                                        |
| <b>Module 7: cAMP Degradation</b>                                    |                                                                                                                                       |               |                                                                                                                             |
| 13                                                                   | $cAMP + PDE1 \cdot Ca_4 \cdot CaM \xrightarrow{K_{cat13}} AMP$                                                                        | MM            | $R_{13} = (K_{cat13}[PDE1Ca_4CaM][cAMP]/K_{m13} + [cAMP]) - K_{r13}[AMP]$                                                   |
| 14                                                                   | $cAMP + PDE4 \xrightarrow{K_{cat14}} AMP$                                                                                             | MM            | $R_{14} = (K_{cat14}[PDE4][cAMP]/K_{m14} + [cAMP]) - K_{r14}[AMP]$                                                          |
| 15                                                                   | $cAMP + PDE4P \xrightarrow{K_{cat15}} AMP$                                                                                            | MM            | $R_{15} = (K_{cat15}[PDE4P][cAMP]/K_{m15} + [cAMP]) - K_{r15}[AMP]$                                                         |
| <b>Module 8: AC1 Activation and cAMP Production by G<sub>s</sub></b> |                                                                                                                                       |               |                                                                                                                             |
| 16                                                                   | $ISO + \beta_2AR \xrightleftharpoons[k_{b16}]{k_{f16}} ISO \cdot \beta_2AR$                                                           | MA            | $R_{16} = k_{f16}[ISO][\beta_2AR] - k_{b16}[ISO \cdot \beta_2AR]$                                                           |
| 17                                                                   | $ISO \cdot \beta_2AR + G_{s\alpha\beta\gamma} \xrightleftharpoons[k_{b17}]{k_{f17}} ISO \cdot \beta_2AR \cdot G_{s\alpha\beta\gamma}$ | MA            | $R_{17} = k_{f17}[ISO \cdot \beta_2AR][G_{s\alpha\beta\gamma}] - k_{b17}[ISO \cdot \beta_2AR \cdot G_{s\alpha\beta\gamma}]$ |
| 18                                                                   | $ISO \cdot \beta_2AR \cdot G_{s\alpha\beta\gamma} \xrightarrow{k_{f18}} ISO \cdot \beta_2AR \cdot G_{\beta\gamma} + G_{s\alpha}GTP$   | MA            | $R_{18} = k_{f18}[ISO \cdot \beta_2AR \cdot G_{s\alpha\beta\gamma}]$                                                        |
| 19                                                                   | $\beta_2AR + G_{s\alpha\beta\gamma} \xrightleftharpoons[k_{b19}]{k_{f19}} \beta_2AR \cdot G_{s\alpha\beta\gamma}$                     | MA            | $R_{19} = k_{f19}[\beta_2AR][G_{s\alpha\beta\gamma}] - k_{b19}[\beta_2AR \cdot G_{s\alpha\beta\gamma}]$                     |
| 20                                                                   | $ISO + \beta_2AR \cdot G_{s\alpha\beta\gamma} \xrightleftharpoons[k_{b20}]{k_{f20}} ISO \cdot \beta_2AR \cdot G_{s\alpha\beta\gamma}$ | MA            | $R_{20} = k_{f20}[ISO][\beta_2AR \cdot G_{s\alpha\beta\gamma}] - k_{b20}[ISO \cdot \beta_2AR \cdot G_{s\alpha\beta\gamma}]$ |
| 21                                                                   | $ISO \cdot \beta_2AR \cdot G_{s\alpha\beta\gamma} \xrightarrow{k_{f21}} ISO \cdot \beta_2AR \cdot G_{\beta\gamma} + G_{s\alpha}GTP$   | MA            | $R_{21} = k_{f21}[ISO \cdot \beta_2AR \cdot G_{s\alpha\beta\gamma}]$                                                        |
| 22                                                                   | $ISO \cdot \beta_2AR \cdot G_{\beta\gamma} \xrightarrow{k_{f22}} ISO \cdot \beta_2AR + G_{\beta\gamma}$                               | MA            | $R_{22} = k_{f22}[ISO \cdot \beta_2AR \cdot G_{\beta\gamma}]$                                                               |
| 23                                                                   | $G_{s\alpha}GTP \xrightarrow{k_{f23}} G_{s\alpha}GDP$                                                                                 | MA            | $R_{23} = k_{f23}[G_{s\alpha}GTP]$                                                                                          |
| 24                                                                   | $G_{s\alpha}GDP + G_{\beta\gamma} \xrightarrow{k_{f24}} G_{s\alpha\beta\gamma}$                                                       | MA            | $R_{24} = k_{f24}[G_{s\alpha}GDP][G_{\beta\gamma}]$                                                                         |
| 25                                                                   | $AC1 + G_{s\alpha}GTP \xrightleftharpoons[k_{b25}]{k_{f25}} AC1 \cdot G_{s\alpha}GTP$                                                 | MA            | $R_{25} = k_{f25}[AC1][G_{s\alpha}GTP] - k_{b25}[AC1 \cdot G_{s\alpha}GTP]$                                                 |
| 26                                                                   | $AC1 \cdot G_{s\alpha}GTP + Ca_4CaM \xrightleftharpoons[k_{b26}]{k_{f26}} AC1 \cdot G_{s\alpha}GTP \cdot Ca_4CaM$                     | MA            | $R_{26} = k_{f26}[AC1 \cdot G_{s\alpha}GTP][Ca_4CaM] - k_{b26}[AC1 \cdot G_{s\alpha}GTP \cdot Ca_4CaM]$                     |
| 27                                                                   | $ATP + AC1 \cdot G_{s\alpha}GTP \cdot Ca_4CaM \xrightarrow{K_{cat27}} cAMP$                                                           | MM            | $R_{27} = (K_{cat27}[AC1 \cdot G_{s\alpha}GTP \cdot Ca_4CaM][ATP]/K_{m27} + [ATP])$                                         |

Enzymes are shown in bold type. CB, cooperative binding; MA, mass action; MM, Michaelis-Menten.

**TABLE 2** Reaction Parameters Calculated for the Model

| Reaction Rate | $k_f$ | Unit                                   | $k_b$  | Unit                                   | $K_{cat}$      | Unit            | $K_m$            | Unit          | $K_r$ | Unit            |
|---------------|-------|----------------------------------------|--------|----------------------------------------|----------------|-----------------|------------------|---------------|-------|-----------------|
| $R_1$         | 0.1   | $\mu\text{M}^{-2} \cdot \text{s}^{-1}$ | 1      | $\text{s}^{-1}$                        | N/A            | N/A             | N/A              | N/A           | N/A   | N/A             |
| $R_2$         | 0.5   | $\mu\text{M}^{-2} \cdot \text{s}^{-1}$ | 1      | $\text{s}^{-1}$                        | N/A            | N/A             | N/A              | N/A           | N/A   | N/A             |
| $R_3$         | 45.46 | $\mu\text{M}^{-1} \cdot \text{s}^{-1}$ | 1      | N/A                                    | N/A            | N/A             | N/A              | N/A           | N/A   | N/A             |
| $R_4$         | 6.89  | $\text{s}^{-1}$                        | 0.39   | $\text{s}^{-1}$                        | N/A            | N/A             | 93.02            | $\mu\text{M}$ | N/A   | N/A             |
| $R_5$         | 87.65 | $\mu\text{M}^{-1} \cdot \text{s}^{-1}$ | 1      | $\text{s}^{-1}$                        | N/A            | N/A             | N/A              | N/A           | N/A   | N/A             |
| $R_6$         | 49.80 | $\text{s}^{-1}$                        | 1.09   | $\text{s}^{-1}$                        | N/A            | N/A             | 6.95             | $\mu\text{M}$ | N/A   | N/A             |
| $R_7$         | N/A   | N/A                                    | N/A    | N/A                                    | 7.41           | $\text{s}^{-1}$ | 193.73           | $\mu\text{M}$ | 0.44  | $\text{s}^{-1}$ |
| $R_8$         | 0.19  | $\mu\text{M}^{-2} \cdot \text{s}^{-1}$ | 1      | $\text{s}^{-1}$                        | N/A            | N/A             | N/A              | N/A           | N/A   | N/A             |
| $R_9$         | 27.89 | $\mu\text{M}^{-2} \cdot \text{s}^{-1}$ | 1      | $\text{s}^{-1}$                        | N/A            | N/A             | N/A              | N/A           | N/A   | N/A             |
| $R_{10}$      | 0.21  | $\text{s}^{-1}$                        | 1      | $\mu\text{M}^{-2} \cdot \text{s}^{-1}$ | N/A            | N/A             | N/A              | N/A           | N/A   | N/A             |
| $R_{11}$      | N/A   | N/A                                    | N/A    | N/A                                    | 0.10           | $\text{s}^{-1}$ | 0.42             | $\mu\text{M}$ | 0.12  | $\text{s}^{-1}$ |
| $R_{12}$      | N/A   | N/A                                    | N/A    | N/A                                    | 7.67           | $\text{s}^{-1}$ | 1.34             | $\mu\text{M}$ | 0.02  | $\text{s}^{-1}$ |
| $R_{13}$      | N/A   | N/A                                    | N/A    | N/A                                    | 1 <sup>a</sup> | $\text{s}^{-1}$ | 35 <sup>a</sup>  | $\mu\text{M}$ | 0     | $\text{s}^{-1}$ |
| $R_{14}$      | N/A   | N/A                                    | N/A    | N/A                                    | 8.66           | $\text{s}^{-1}$ | 1.21             | $\mu\text{M}$ | 0.10  | $\text{s}^{-1}$ |
| $R_{15}$      | N/A   | N/A                                    | N/A    | N/A                                    | 1.59           | $\text{s}^{-1}$ | 0.84             | $\mu\text{M}$ | 0     | $\text{s}^{-1}$ |
| $R_{16}$      | 5.556 | $\mu\text{M}^{-1} \cdot \text{s}^{-1}$ | 5      | $\text{s}^{-1}$                        | N/A            | N/A             | N/A              | N/A           | N/A   | N/A             |
| $R_{17}$      | 0.6   | $\mu\text{M}^{-1} \cdot \text{s}^{-1}$ | 0.001  | $\text{s}^{-1}$                        | N/A            | N/A             | N/A              | N/A           | N/A   | N/A             |
| $R_{18}$      | 20    | $\text{s}^{-1}$                        | N/A    | N/A                                    | N/A            | N/A             | N/A              | N/A           | N/A   | N/A             |
| $R_{19}$      | 0.04  | $\mu\text{M}^{-1} \cdot \text{s}^{-1}$ | 0.0003 | $\text{s}^{-1}$                        | N/A            | N/A             | N/A              | N/A           | N/A   | N/A             |
| $R_{20}$      | 2.5   | $\mu\text{M}^{-1} \cdot \text{s}^{-1}$ | 0.5    | $\text{s}^{-1}$                        | N/A            | N/A             | N/A              | N/A           | N/A   | N/A             |
| $R_{21}$      | 20    | $\text{s}^{-1}$                        | N/A    | N/A                                    | N/A            | N/A             | N/A              | N/A           | N/A   | N/A             |
| $R_{22}$      | 80    | $\text{s}^{-1}$                        | N/A    | N/A                                    | N/A            | N/A             | N/A              | N/A           | N/A   | N/A             |
| $R_{23}$      | 1     | $\text{s}^{-1}$                        | N/A    | N/A                                    | N/A            | N/A             | N/A              | N/A           | N/A   | N/A             |
| $R_{24}$      | 100   | $\mu\text{M}^{-1} \cdot \text{s}^{-1}$ | N/A    | N/A                                    | N/A            | N/A             | N/A              | N/A           | N/A   | N/A             |
| $R_{25}$      | 38.5  | $\mu\text{M}^{-1} \cdot \text{s}^{-1}$ | 10     | $\text{s}^{-1}$                        | N/A            | N/A             | N/A              | N/A           | N/A   | N/A             |
| $R_{26}$      | 6     | $\mu\text{M}^{-1} \cdot \text{s}^{-1}$ | 0.9    | $\text{s}^{-1}$                        | N/A            | N/A             | N/A              | N/A           | N/A   | N/A             |
| $R_{27}$      | 10    | $\mu\text{M}^{-1} \cdot \text{s}^{-1}$ | 2273   | $\text{s}^{-1}$                        | 56.84          | $\text{s}^{-1}$ | 233 <sup>b</sup> | $\mu\text{M}$ | N/A   | N/A             |

N/A, not applicable.

<sup>a</sup>All the kinetic parameters are calculated by fitting the experimental data to the kinetic equations. The kinetic parameters of reaction 13 are directly extracted from (70) and the kinetic parameters of reactions 16–27 are directly extracted from (43).

<sup>b</sup> $K_m = \frac{K_{cat} + k_b}{k_f}$ .

### cAMP production

ACs catalyze the conversion of ATP into cAMP. cAMP is implicated in both LTP and LTD by activating PKA (93–96). In our model, fully activated AC1,  $\text{AC1} \cdot \text{Ca}_4 \cdot \text{CaM}$ , catalyzes the formation of cAMP from ATP (reaction 7 in Table 1). This reaction is modeled by Michaelis-Menten kinetics with a basal degradation term. The basal activity of the type I AC is regulated by calcium-calmodulin (97). In the absence of  $\text{Ca}^{2+}$  influx, AC1 shows a low level of basal activity, producing modest levels of cAMP (98). Therefore, the AC1 basal cAMP production has not been explicitly modeled as an individual reaction. The steady-state amount of generated cAMP with ATP is evaluated using experimental data from (68) shown in Fig. 2 C.

### PKA activation

PKA has two catalytic subunits and a regulatory dimer that binds to the catalytic subunits (99,100). RII $\beta$  is the dominant PKA isoform expressed in the brain (101). cAMP binds to its effector, PKA, and regulates the activity of regulatory subunits. Then, PKA phosphorylates different protein kinases responsible for neuron growth and differentiation, such as LKB1 and GSK-3 $\beta$  in the hippocampus (91). Activation of PKA by cAMP is modeled in three steps, inspired by (101), with some modifications in the order of A- and B-domain binding of cAMP that was observed in experiments by (102). First, two cAMP molecules bind to the A-domain (reaction 8 in Table 1); then the other two cAMP molecules bind to the B-domain (reaction 9 in Table 1). Finally, when all four cAMP molecules are bound to A- and B-domains, the two catalytic subunits are released (reaction 10 in Table 1). These reaction schemas are evaluated by experimental data from (102) for steady-state cAMP concentration and PKA formation shown in Fig. 2 D, and kinetic parameters are given in Table 2.

### PDE phosphorylation by PKA

Both PDE1A and PDE4A can be phosphorylated by PKA. PKA phosphorylation of PDE1A alters its affinity toward both calcium and calmodulin (69). PDE4 is a cAMP-specific PDE, and its activity is increased two- to sixfold upon PKA phosphorylation (91). Different PDE4 isoforms (PDE4A, PDE4B, PDE4D) are targeted to synapses to regulate the cAMP level and modulate synaptic plasticity in learning and memory (91). PDE4A (the PDE4 subtype used in our model) is highly expressed in the CA1 subregions of the rat hippocampus and is the major PDE4 subtype involved in mediating memory (88). The phosphorylation reactions of the two different PDE isoforms are modeled by Michaelis-Menten kinetics with a basal degradation, in which PKA acts as an enzyme in both of these reactions (reactions 11 and 12 in Table 1). These reactions are evaluated at steady state to show how PKA phosphorylation affects the activity of PDE1A and PDE4 in comparison with experiments from (69) and (71) in Fig. 2, E and F, respectively.

### cAMP degradation

We assumed that cAMP can be degraded to AMP by PDE1  $\cdot$   $\text{Ca}_4 \cdot$  CaM, PDE4, and PDE4P (PDE4 phosphorylated by PKA). All cAMP inhibition reactions are modeled by Michaelis-Menten kinetics with a basal degradation term, in which PDEs act as enzymes (reactions 13–15 in Table 1). cAMP hydrolysis by PDE4 and PDE4P evaluated against experimental data from (71) is shown in Fig. 2 F.

### AC1 activation by $G_s$

There is some evidence indicating that the activity of NMDARs may be potentiated by stimulating G-protein-coupled receptors. Raman et al.

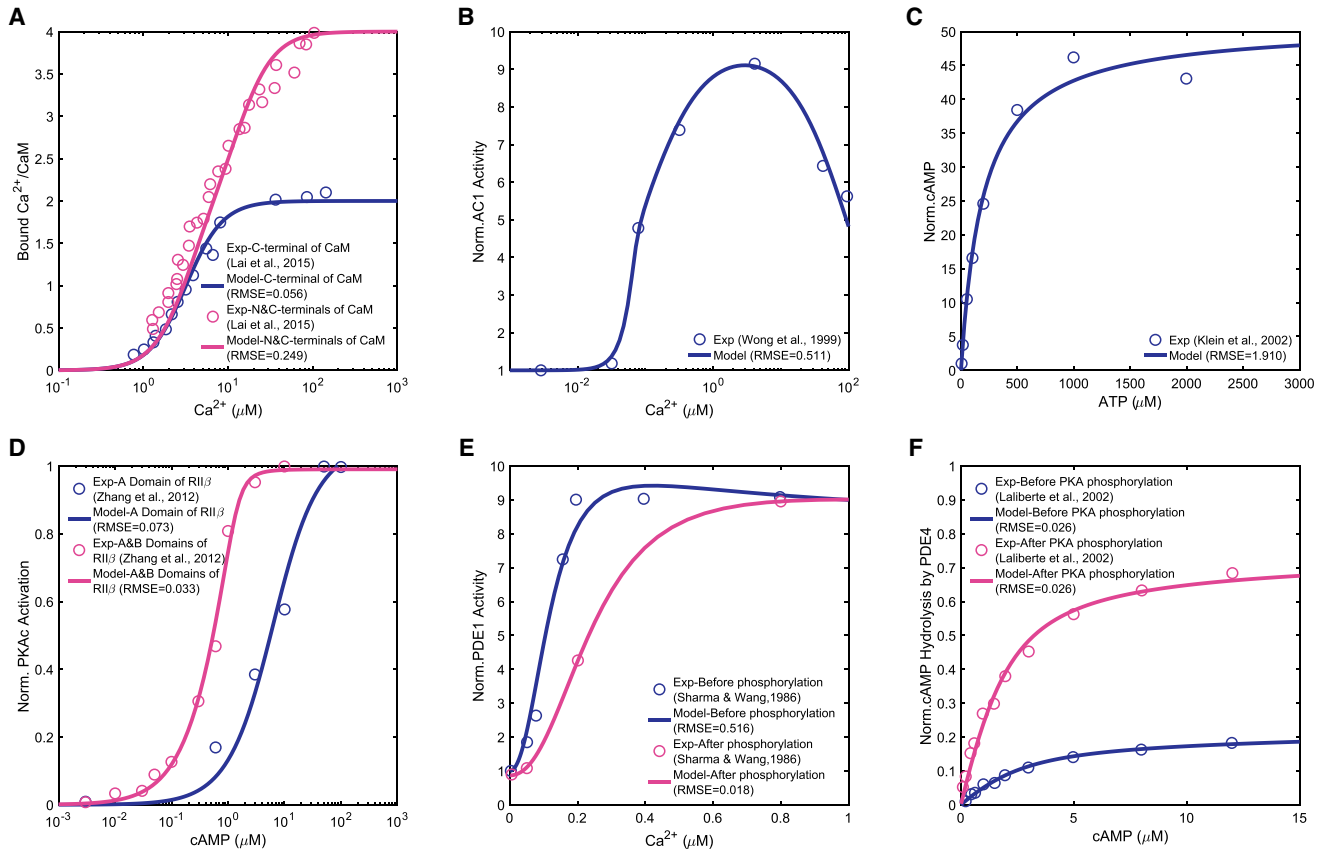

FIGURE 2 Steady-state parameter scans to evaluate the model based on available experimental data in the literature: (A) saturation curve of C- and N-lobes of calmodulin predicted by our model and a comparison with experimental data from (80). (B)  $\text{Ca}^{2+}$ -stimulated AC activity predicted by our model and a comparison with experimental data from (67). (C) cAMP production at increasing concentrations of ATP predicted by our model and a comparison with experimental data from (68). (D) Activation of RII $\beta$  holoenzymes by cAMP in A- and B-domains predicted by our model and a comparison with experimental data from (102). (E) Activation of PDE isoenzyme PDE1A by different concentrations of  $\text{Ca}^{2+}$  before and after the phosphorylation of the isoenzyme by PKA, predicted by our model, and a comparison with experimental data from (69). (F) PDE4A-catalyzed cAMP hydrolysis at increasing cAMP concentration before and after PKA phosphorylation, predicted by our model, and a comparison with experimental data from (71). It must be noted that none of the experimental data sets in the literature reported error bars or standard deviations for the measured data points. To see this figure in color, go online.

(103) have shown that stimulation of  $\beta$ ARs during excitatory synaptic transmission can increase charge transfer and  $\text{Ca}^{2+}$  influx through NMDARs. Gereau and Conn (104) have also tested the hypothesis that coactivation of mGluRs and a  $G_s$ -coupled receptor (the  $\beta$ AR) could lead to large increases in cAMP accumulation in hippocampus and thereby increase synaptic responses in area CA1. They report that coactivation of metabotropic glutamate receptors (mGluRs) and  $\beta$ ARs is not accompanied by an increase in excitatory postsynaptic currents or by a decrease in synaptic inhibition in area CA1, suggesting that it is not mediated by a lasting change in excitatory or inhibitory synaptic transmission. However, coactivation of these receptors leads to a persistent depolarization of CA1 pyramidal cells with a concomitant increase in input resistance.

$G_s$  can have an additional effect on AC1 activation. Stimulation of  $\beta$ -adrenergic receptors by an agonist such as isoproterenol (ISO) can activate the  $G_s$  subtype of GTP-binding protein, which stimulates AC isoforms (105). A study by Wayman et al. (84) suggests that AC1 enzyme is stimulated by  $G_s$ -coupled receptors in vivo when it is activated by intracellular calcium. Based on these experimental observations, reactions 15–27 (Table 1) has been reproduced from (43) exactly as is to take into account the effect of AC1 activation and cAMP production by  $G_s$ .

The list of the above reactions and estimated parameters are shown in Tables 1 and 2, respectively.

## Ordinary differential equations

The temporal dynamics of each species,  $c$ , is defined as

$$\frac{dc_i}{dt} = J_i, \quad (1)$$

where  $c_i$ ,  $i \in 1, 2, \dots, 21$ , represents the concentration of the  $i^{\text{th}}$  species as a function of time and  $J_i$  is the net reaction flux for the  $i^{\text{th}}$  species. These ordinary differential equations (ODEs) and the corresponding initial concentrations of the different species are shown in Table 3. The sensitivity analysis with respect to kinetic parameters and initial conditions of the model with respect to transient cAMP concentration are shown in Fig. 3.

## $\text{Ca}^{2+}$ input signals as the stimulus

The four different types of input calcium are modeled as

- 1) sinusoidal oscillations ( $\omega_1 = 0.5$  Hz) with exponential decay that is repeated every 5 min ( $\omega_2 = 0.003$  Hz):

$$\text{Ca}^{2+}(t) = (0.45\sin\pi(t - 0.5) + 0.45)(1 - 0.01)^t + [\text{Ca}^{2+}]_{rest} [\mu\text{M}]; \quad (2)$$

**TABLE 3** Initial Concentrations and ODEs

| Species                                                  | Concentration (nM) | ODE                                                                                        |
|----------------------------------------------------------|--------------------|--------------------------------------------------------------------------------------------|
| Ca <sup>2+</sup>                                         | 100                | $(d[Ca^{2+}]/dt) = -2R_1 - 2R_2 - 2R_4 - 2R_6$                                             |
| CaM                                                      | 1240               | $d[CaM]/dt = -R_1$                                                                         |
| Ca <sub>2</sub> · CaM                                    | 0                  | $(d[Ca_2CaM]/dt) = R_1 - R_2 - R_3 - R_5$                                                  |
| Ca <sub>4</sub> · CaM                                    | 0                  | $(d[Ca_4CaM]/dt) = R_2 - R_{26}$                                                           |
| AC1                                                      | 5000               | $(d[AC1]/dt) = -R_3 - R_{25}$                                                              |
| AC1 · Ca <sub>2</sub> · CaM                              | 0                  | $(d[AC1Ca_2CaM]/dt) = R_3 - R_4$                                                           |
| AC1 · Ca <sub>4</sub> · CaM                              | 0                  | $(d[AC1Ca_4CaM]/dt) = R_4$                                                                 |
| PDE1                                                     | 3800               | $(d[PDE1]/dt) = -R_5 - R_{11}$                                                             |
| PDE1 · Ca <sub>2</sub> · CaM                             | 0                  | $(d[PDE1Ca_2CaM]/dt) = R_5 - R_6$                                                          |
| PDE1 · Ca <sub>4</sub> · CaM                             | 0                  | $(d[PDE1Ca_4CaM]/dt) = R_6$                                                                |
| ATP                                                      | $2 \times 10^6$    | $(d[ATP]/dt) = -R_7 - R_{27}$                                                              |
| cAMP                                                     | 0                  | $(d[cAMP]/dt) = R_7 - 2R_8 - 2R_9 - R_{13} - R_{14} - R_{15} + R_{27}$                     |
| R <sub>2</sub> C <sub>2</sub>                            | 220                | $(d[R_2C_2]/dt) = -R_8$                                                                    |
| R <sub>2</sub> C <sub>2</sub> · cAMP <sub>2</sub>        | 0                  | $(d[R_2C_2cAMP_2]/dt) = R_8 - R_9$                                                         |
| R <sub>2</sub> C <sub>2</sub> · cAMP <sub>4</sub>        | 0                  | $(d[R_2C_2cAMP_4]/dt) = R_9 - R_{10}$                                                      |
| R <sub>2</sub> · cAMP <sub>4</sub>                       | 0                  | $(d[R_2cAMP_4]/dt) = R_{10}$                                                               |
| PKAc                                                     | 10                 | $(d[PKAc]/dt) = 2R_{10}$                                                                   |
| PDE1P                                                    | 0                  | $(d[PDE1P]/dt) = R_{11}$                                                                   |
| PDE4                                                     | 1000               | $(d[PDE4]/dt) = -R_{12}$                                                                   |
| PDE4P                                                    | 0                  | $(d[PDE4P]/dt) = R_{12}$                                                                   |
| AMP                                                      | 0                  | $(d[AMP]/dt) = R_{13} + R_{14} + R_{15}$                                                   |
| ISO                                                      | 4 <sup>a</sup>     | $(d[ISO]/dt) = -R_{16} - R_{20}$                                                           |
| β <sub>2</sub> AR                                        | 19.2 <sup>a</sup>  | $(d[\beta_2AR]/dt) = -R_{16} - R_{19}$                                                     |
| ISO · β <sub>2</sub> AR                                  | 1.2 <sup>a</sup>   | $(d[ISO \cdot \beta_2AR]/dt) = R_{16} - R_{17} + R_{22}$                                   |
| G <sub>sa</sub> β <sub>γ</sub>                           | 3654 <sup>a</sup>  | $(d[G_{sa}\beta_\gamma]/dt) = -R_{17} - R_{19} + R_{24}$                                   |
| ISO · β <sub>2</sub> AR · G <sub>sa</sub> β <sub>γ</sub> | 1.2 <sup>a</sup>   | $(d[ISO \cdot \beta_2AR \cdot G_{sa}\beta_\gamma]/dt) = R_{17} - R_{18} + R_{20} - R_{21}$ |
| ISO · β <sub>2</sub> AR · G <sub>βγ</sub>                | 0                  | $(d[ISO \cdot \beta_2AR \cdot G_{\beta\gamma}]/dt) = R_{18} + R_{21} - R_{22}$             |
| β <sub>2</sub> AR · G <sub>sa</sub> β <sub>γ</sub>       | 709.2 <sup>a</sup> | $(d[\beta_2AR \cdot G_{sa}\beta_\gamma]/dt) = R_{19} - R_{20}$                             |
| G <sub>sa</sub> GTP                                      | 1.2 <sup>a</sup>   | $(d[G_{sa}GTP]/dt) = R_{18} + R_{21} - R_{23} - R_{25}$                                    |
| G <sub>sa</sub> GDP                                      | 0                  | $(d[G_{sa}GDP]/dt) = R_{23} - R_{24}$                                                      |
| G <sub>βγ</sub>                                          | 118.8 <sup>a</sup> | $(d[G_{\beta\gamma}]/dt) = R_{22} - R_{24}$                                                |
| AC1 · G <sub>sa</sub> GTP                                | 52.8 <sup>a</sup>  | $(d[AC1 \cdot G_{sa}GTP]/dt) = R_{25} - R_{26}$                                            |
| AC1 · G <sub>sa</sub> GTP · Ca <sub>4</sub> · CaM        | 1.2 <sup>a</sup>   | $(d[AC1 \cdot G_{sa}GTP \cdot Ca_4CaM]/dt) = R_{26}$                                       |

All the initial concentrations are estimated in COPASI using the experimental data fitted to the model parameters. Membrane-bound molecule concentrations are converted from (mol/μm<sup>2</sup>) to nM by volume to surface ratio of the compartment.

<sup>a</sup>The concentrations are taken from (43).

- 2) calcium bursts with exponential decay that are being repeated every 5 min ( $\omega_2 = 0.003$  Hz):

$$Ca^{2+}(t) = 0.95(1 - 0.01)^t + \frac{[Ca^{2+}]_{rest}}{2} [\mu M]; \quad (3)$$

- 3) nonoscillating calcium

$$Ca^{2+}(t_0) = 10 [Ca^{2+}]_{rest} [\mu M], \quad (4)$$

in which  $[Ca^{2+}]_{rest} = 0.1$  μM is the resting concentration of calcium in the cytoplasm;

- 4) and experimental measurements of calcium: spontaneous calcium oscillations measured in neurons are shown in Fig. 6. The measured calcium is in the range of 0.1–10 μM, with oscillations in the second timescale.

## Numerical methods

The system of ODEs for this model is solved for a time course of 1800 s and interval size of 0.1 (s) through a deterministic simulation in COPASI (106). Using a deterministic algorithm (LSODA), the system of ODEs is solved with a dense or banded Jacobian when the problem is stiff and automatically selects between nonstiff (Adams) and stiff (BDF) methods by initially using the nonstiff method and dynamically monitoring data to decide which method to use (107). Parameter estimations were conducted in COPASI using the

evolutionary programming method (108–110). The link to the model will be available on <https://github.com/donya26/cAMP-PKA-temporal.git>.

## Sensitivity analysis

In the sensitivity analysis of kinetic parameters with respect to transient cAMP concentration (Fig. 3), kinetic parameters of reactions related to activation of AC1 and PDE1 enzymes by Ca<sup>2+</sup>/CaM complex (reactions 3–6) show the most significant effect on cAMP concentration (Fig. 3 A). However, kinetic parameters related to AC1 activation by G<sub>s</sub> shows almost no effect on cAMP concentration (Fig. 3 B). Finally, initial concentration of these Ca<sup>2+</sup>-sensitive enzymes (AC1 and PDE1) and calmodulin shows the most significant effect on cAMP concentration (Fig. 3 C). It is important to note that the compartment size has a trivial effect on the model (Fig. 3 C). These results show the significance of regulation of cAMP/PKA pathway through Ca<sup>2+</sup>-sensitive enzyme activations. Sensitivity analyses were conducted in COPASI by numerical differentiation using finite differences (111).

## Stochastic simulations

Spines are small compartments, and neuronal activity in the spines is mediated through changes in the probability of stochastic transitions between the open and closed states of ion channels (112). In this model, the focus has been on cAMP regulation, and for the sake of simplicity, we did not consider such



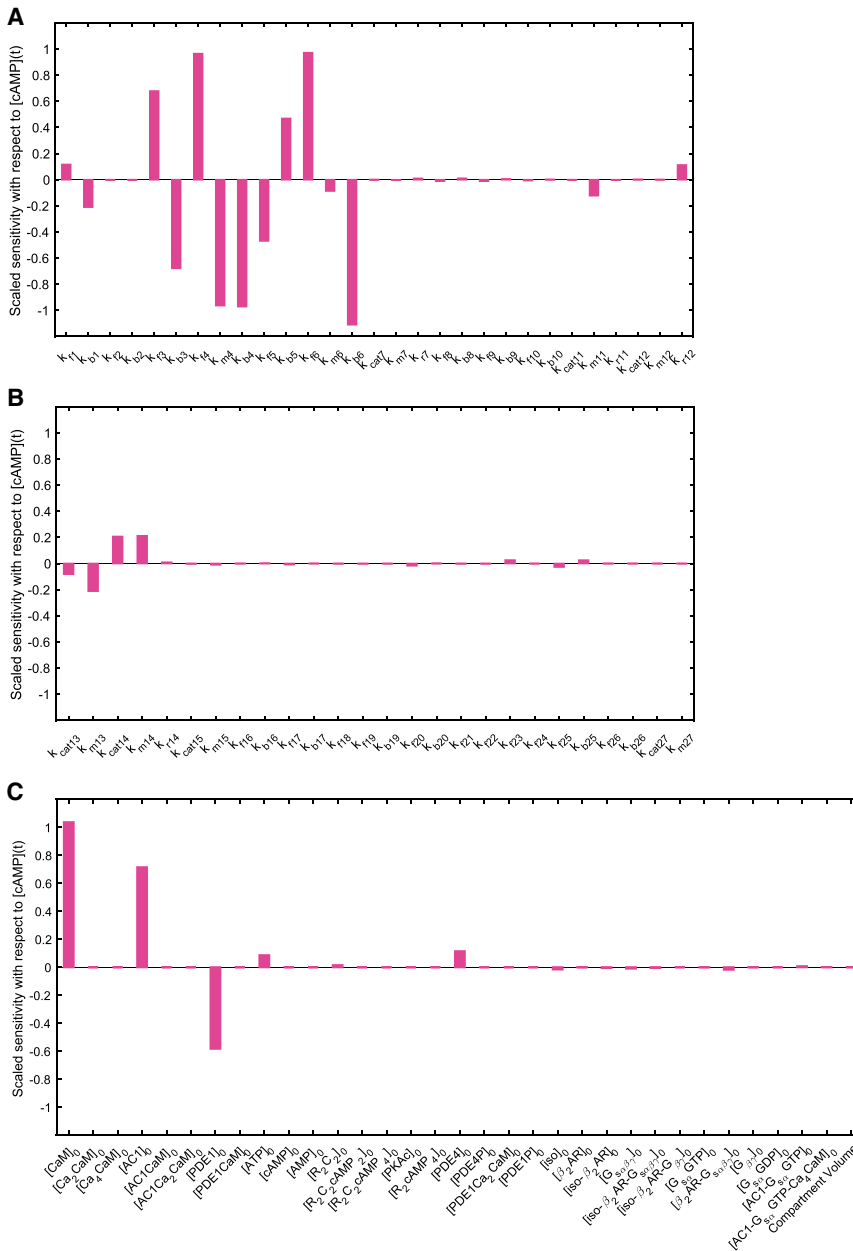

FIGURE 3 Sensitivity analysis with respect to cAMP transient concentration for (A) parameters of reactions 1–12, (B) parameters of reactions 13–27, and (C) initial concentrations and compartment volume. Kinetic parameters of reactions 3–6 and initial concentrations of calmodulin, AC1, and PDE1 show the highest impact on cAMP transient concentration. To see this figure in color, go online.

stochastic calcium-related events. However, to make sure that the stochasticity will not change the obtained results, we also simulated the model stochastically ( $\tau$ -leap method-using COPASI). Although to conduct the simulations stochastically, we had to make some changes to the model (e.g., we had to make all the reactions irreversible and change some of the reaction rates), we saw almost the same trend with deterministic and stochastic methods (Fig. S2). However, to better capture oscillation regulation of different components of the pathway, we modeled the system deterministically.

## RESULTS

### Large-frequency modulation of immediate downstream effectors of calcium

The first module of the model focused on the formation of the calcium-calmodulin complex. Calcium input was modeled as

a sinusoidal function with a 2 s oscillation period with an exponential decay every 5 min (Fig. 4 A; (63)). From here onwards, we refer to the larger frequency as  $\omega_1$  for the oscillations in the second timescale and the smaller frequency as  $\omega_2$  for the oscillations in the minute timescale. The dynamics of calmodulin consumption leading to the formation of  $\text{Ca}_2 \cdot \text{CaM}$  respond only to the low-frequency oscillations of calcium in the minute scale (Fig. 4 A).  $\text{Ca}_2 \cdot \text{CaM}$  demonstrates both low-frequency (minute-scale) and high-frequency (second-scale) oscillations (Fig. 4). In the next step, two more  $\text{Ca}^{2+}$  ions bind to  $\text{Ca}_2 \cdot \text{CaM}$  to form  $\text{Ca}_4 \cdot \text{CaM}$ .  $\text{Ca}_4 \cdot \text{CaM}$  also responds to second-scale oscillations of calcium; however, the oscillation amplitudes are almost 10-fold lower in comparison with  $\text{Ca}_2 \cdot \text{CaM}$  (Fig. 4 A). Another key difference between the observed

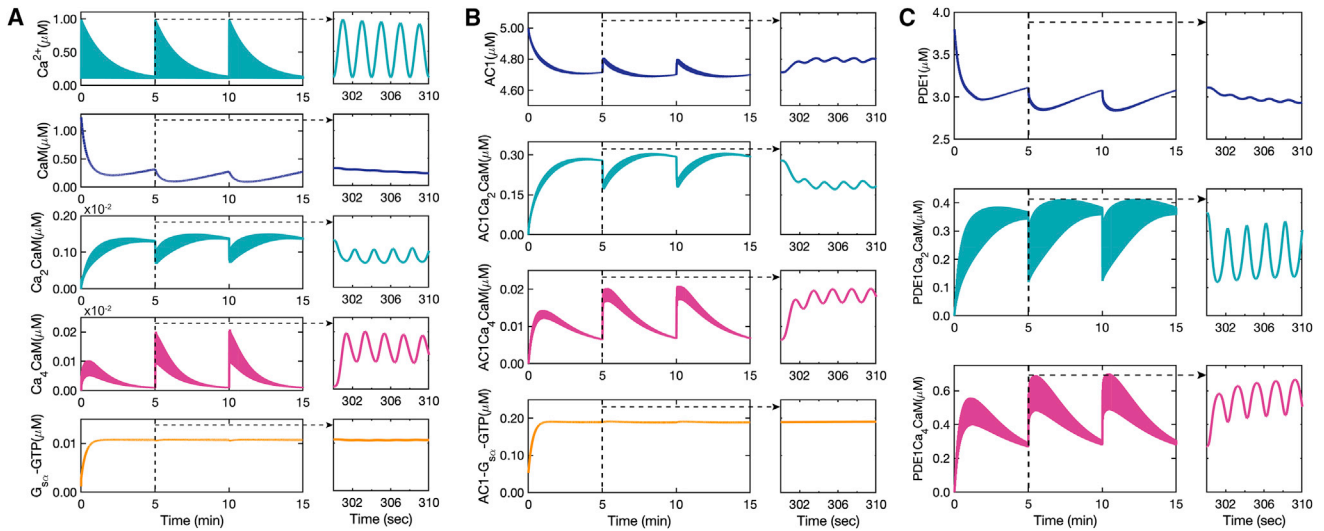

FIGURE 4  $\text{Ca}^{2+}$ -CaM complex formation and  $\text{Ca}^{2+}$ -CaM-activated enzymes' time course predicted by our model: (A) calcium input with sinusoidal oscillations (0.5 Hz) and exponential decay (0.003 Hz) as the stimulus in the model. Free calmodulin concentration over a 15 min and a 10 s time course showing only minute-scale oscillations. The first step of calcium-calmodulin binding of two calcium ions to the C-lobe of calmodulin over a 15 min and a 10 s time course.  $\text{Ca}^{2+} \cdot \text{CaM}$  shows both minute-scale (0.003 Hz) and second-scale (0.5 Hz) oscillations. The second step of calcium-calmodulin binding of another two calcium ions to N-lobe of calmodulin over a 15 min and a 10 s time course.  $\text{Ca}_4 \cdot \text{CaM}$  also shows both minute-scale (0.003 Hz) and second-scale (0.5 Hz) oscillations. However,  $G_s$  as the other component responsible for AC1 activation shows no oscillations because it is not activated by  $\text{Ca}^{2+}$ . (B) AC1 partial activation by  $\text{Ca}_2 \cdot \text{CaM}$  to form  $\text{AC1} \cdot \text{Ca}_2 \cdot \text{CaM}$ , followed by binding of two extra calcium ions to fully activate AC1 and form  $\text{AC1} \cdot \text{Ca}_4 \cdot \text{CaM}$ . Unlike AC1 activated by  $\text{Ca}^{2+}$ , AC1 activated by  $G_s$  shows no oscillations, (C) PDE1 partial activation by  $\text{Ca}_2 \cdot \text{CaM}$  initially followed by further binding of two calcium ions to fully activate PDE1 and form  $\text{PDE1} \cdot \text{Ca}_4 \cdot \text{CaM}$ . To see this figure in color, go online.

oscillation patterns of  $\text{Ca}_2 \cdot \text{CaM}$  and  $\text{Ca}_4 \cdot \text{CaM}$  is that the  $\text{Ca}_2 \cdot \text{CaM}$  oscillation pattern seems to be mainly driven by CaM on the minute scale, whereas the  $\text{Ca}_4 \cdot \text{CaM}$  oscillation pattern looks almost exactly like calcium patterns with less significant oscillations on the second scale.

AC1 and PDE1 are activated by the  $\text{Ca}^{2+}$ /CaM complex.  $\text{Ca}_2 \cdot \text{CaM}$  binds to AC1 and forms  $\text{AC1} \cdot \text{Ca}_2 \cdot \text{CaM}$ . Both AC1 and  $\text{AC1} \cdot \text{Ca}_2 \cdot \text{CaM}$  show second- and minute-scale calcium oscillations (Fig. 4 B), and their oscillation patterns seem to be mostly driven by the  $\text{Ca}_2 \cdot \text{CaM}$  oscillation pattern shown in Fig. 4 C, with less significant second-scale oscillations. In the second step,  $\text{AC1} \cdot \text{Ca}_2 \cdot \text{CaM}$  fully activates AC1 by forming  $\text{AC1} \cdot \text{Ca}_4 \cdot \text{CaM}$  with the other two  $\text{Ca}^{2+}$  ions. In comparison to  $\text{AC1} \cdot \text{Ca}_2 \cdot \text{CaM}$ ,  $\text{AC1} \cdot \text{Ca}_4 \cdot \text{CaM}$  shows less significant second-scale oscillations (almost 10-fold lower), and the minute-scale oscillation seems to be driven by the calcium oscillation pattern (Fig. 4 B).  $\text{AC1} \cdot \text{Ca}_4 \cdot \text{CaM}$  dynamics mostly follow  $\text{Ca}_4 \cdot \text{CaM}$  dynamics with less sensitivity to  $\text{Ca}^{2+}$ . The dynamics of PDE1 activation by  $\text{Ca}_2 \cdot \text{CaM}$  is very similar to AC1. However, both  $\text{PDE1} \cdot \text{Ca}_2 \cdot \text{CaM}$  and  $\text{PDE1} \cdot \text{Ca}_4 \cdot \text{CaM}$  show much higher sensitivity to second-scale oscillations of  $\text{Ca}^{2+}$  (Fig. 4 C).

### Small-frequency modulation of cAMP/PKA and PDE phosphorylation

After enzyme activation by the calcium-calmodulin complex, cAMP is synthesized by  $\text{AC1} \cdot \text{Ca}_4 \cdot \text{CaM}$  and  $\text{AC1} \cdot G_{s\alpha} \text{GTP} \cdot \text{Ca}_4 \cdot \text{CaM}$  from ATP. The contribution of

$\text{Ca}^{2+}$ -CaM-activated AC1 in cAMP production is much more substantial in comparison to  $G_s$ -activated AC1 and cAMP produced by  $\text{AC1} \cdot G_{s\alpha} \text{GTP} \cdot \text{Ca}_4 \cdot \text{CaM}$  is almost negligible (Fig. S3). This is in agreement with experimental observations of Baker et al. (113) and Halls and Cooper (26) showing that the  $G_s$ -coupled receptor does not stimulate the  $G_s$ -insensitive AC1, suggesting calcium-calmodulin binding as the main activation mechanism for AC1s. Then PKA is activated by cAMP and activated PKA phosphorylates PDE1 and PDE4. Finally, cAMP is degraded by PDE1, PDE4, and PDE4P and shows minute-scale oscillations and leaky oscillations on the second scale (Fig. 5 A). PKA is activated by cAMP and as a result, it only shows minute-scale oscillations (Fig. 5 B). Although PDE1-P (phosphorylated PDE1) shows minute-scale oscillations (Fig. 5 C), PDE4P (phosphorylated PDE4) barely shows any oscillations (Fig. 5 D). Degradation of cAMP by PDE4 and PDE4P, which are indirectly affected by calcium oscillations, might filter the second-scale oscillations induced by  $\text{AC1} \cdot \text{CaM}$  in the cAMP synthesis and change the second-scale oscillations to leaky oscillations (Fig. 5 A). Thus, our model predicts that PDEs may filter the large-frequency ( $\omega_1$ ) oscillations of the upstream components driven by calcium dynamics and capture only the smaller frequency ( $\omega_2$ ).

### cAMP/PKA pathway filtering of $\text{Ca}^{2+}$ signals

The response of cAMP/PKA to different calcium patterns raises the following questions: do spines experience vastly

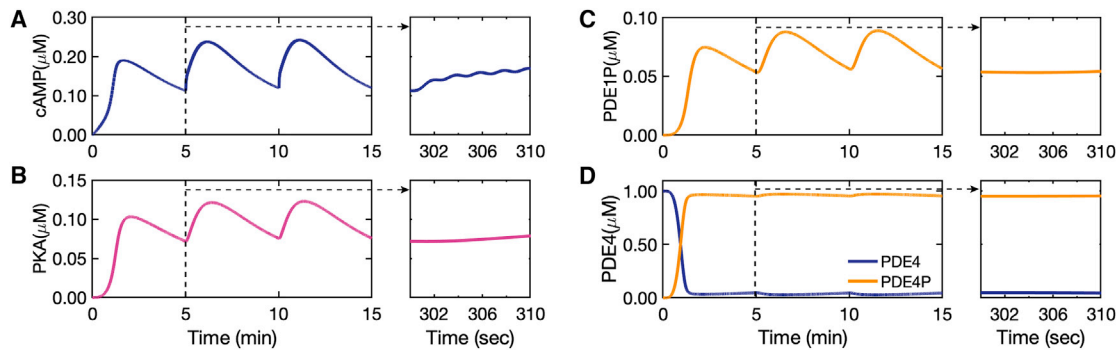

FIGURE 5 cAMP and PKA time course and PDE1 and PDE4 phosphorylation by PKA predicted by our model: (A) cAMP dynamics predicted by our model show mainly minute-scale oscillations and leaky oscillations on the second scale shown in the figure inset. (B) PKA dynamics predicted by our model shows only minute-scale oscillations and no second-scale oscillations (figure inset). (C) Phosphorylation of PDE1 by PKA and formation of phosphorylated PDE1 (PDE1P) that oscillates only on the minute scale. (D) PDE4 and phosphorylated PDE4 (PDE4P) formed by PKA that is indirectly affected by calcium show almost neither of the second- or minute-scale oscillations. To see this figure in color, go online.

varying calcium patterns? Can experimentally measured calcium patterns be used to generate predictions from our model? To answer these questions, we measured basal calcium fluctuations in dendritic spines of hippocampal neurons. Cultured neurons have been previously reported to form neuronal networks in vitro that exhibit spontaneous action potentials (114), which can be measured using reporters of neuronal activity such as calcium sensors. We expressed the genetically encoded calcium biosensor GCaMP6f (115) in primary rat hippocampal neurons. To quantify  $\text{Ca}^{2+}$  oscillations, we assigned calcium concentrations to correspond to changes in the measured fluorescence intensity ( $\Delta F/F$ ), based on previously reported intracellular calcium concentrations (75). Using the measured calcium in three spines from three neurons as the stimulus in the model, we found our model predicts different types of cAMP/PKA dynamics based on the calcium input (Fig. 6). We chose these three spines to reflect the different calcium patterns tested in Fig. 7. The first spine measured has minimal changes in fluorescence intensity and displays a low range of predicted calcium concentrations (0.1–0.2  $\mu\text{M}$ ) (Fig. 6 A). There seem to be no apparent calcium spikes, and the calcium concentration is barely enough to fully activate AC1 and PDE1 and show steady-state cAMP and PKA. AC1  $\cdot$  CaM and PDE1  $\cdot$  CaM integrate some calcium peaks; however, cAMP and PKA do not exhibit significant peaks. The second spine measured shows a higher fluorescence intensity that is almost 10-fold higher than the first data set (Fig. 6 B). In the second spine, AC1, PDE1, cAMP, and PKA reach a steady state. AC1 and PDE1 seem to reflect most of the calcium major peaks, whereas cAMP appears to filter out some of the less significant peaks, and PKA almost shows none of these peaks. The third spine measured shows many calcium spikes and a very high range of fluorescence intensity, which we correlated to a large range of calcium concentrations (Fig. 6 C). The slopes at the first 60 s of simulation show that the activation of AC1 and PDE1, and formation of cAMP and PKA occurs much faster in the third spine

(Fig. 6 C) in comparison to the other two (Fig. 6, A and B). With high ranges of calcium transients, AC1, PDE1, and cAMP seem to integrate most of the calcium peaks, and even PKA has nominal peaks (Fig. 6 C). Thus, we find that for experimentally derived calcium transients, cAMP/PKA serve to filter out the larger frequency ( $\omega_1$ ).

### $\text{Ca}^{2+}$ signal frequency modulates cAMP/PKA dynamics

If it is true that cAMP/PKA filters out  $\omega_1$  dynamics to pick  $\omega_2$  dynamics, then this must hold true for different values of these two frequencies. To further test our predictions, we designed three different calcium inputs (Fig. 7): first, no oscillations of calcium; second,  $\omega_1$  is zero and only  $\omega_2$  is present; and third, both  $\omega_1$  and  $\omega_2$  are present. In the first set of simulations,  $\text{Ca}^{2+}$  input has an initial constant concentration of 1  $\mu\text{M}$  with no oscillations or calcium bursts during the 15 min of oscillations (Fig. 7 A). From AC1  $\cdot$  CaM and PDE1  $\cdot$  CaM to cAMP and PKA, it is evident that there is only one peak of the concentrations for all these species, with a 40–60 s delay between AC1  $\cdot$  CaM and PDE1  $\cdot$  CaM and cAMP/PKA. This behavior has also been observed by (36), in which PKA returns to basal level  $\sim 10$  min after stimulation by a pulse of calcium. For the second set of simulations, starting from the same initial calcium concentration (1  $\mu\text{M}$ ), we simulated a calcium burst every 5 min (Fig. 7 B). These calcium bursts at every 5 min are reflected in AC1  $\cdot$  CaM, PDE1  $\cdot$  CaM, cAMP, and PKA dynamics. The range of concentrations for all of these molecules is the same as the concentration seen in the first simulation (Fig. 7 A). The third set of simulations has sinusoidal oscillations with 2 s periods in addition to the calcium bursts at every 5 min (Fig. 7 C). AC1  $\cdot$  CaM and PDE1  $\cdot$  CaM show both second- and minute-scale oscillations, whereas cAMP and PKA only show the minute-scale oscillations (Fig. 7 C). In comparison to the second simulation (Fig. 7 B), the concentration of AC1  $\cdot$  CaM, PDE1  $\cdot$  CaM, cAMP, and PKA

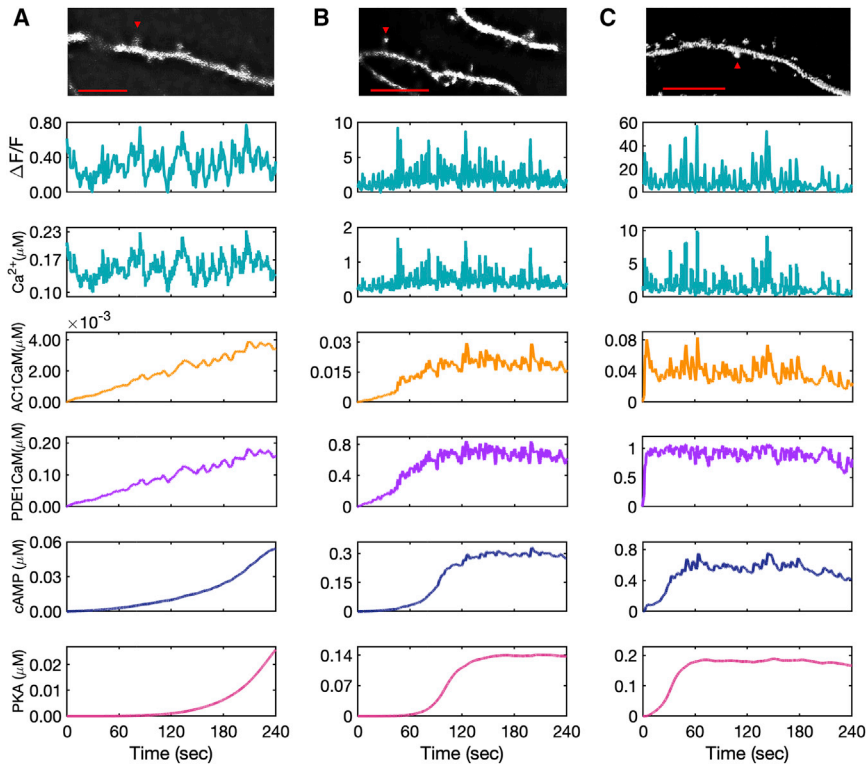

**FIGURE 6** Model predictions for AC1 • CaM, PDE1 • CaM, cAMP, and PKA for experimental calcium input measured from GCaMP6f expressed in DIV 22 primary rat hippocampal neurons. Fluorescence intensity measurements shown for calcium have an arbitrary starting time, and the model system at time zero (start of the recording) is already in equilibrium. The calcium concentration is estimated based on the relative increases and decreases in calcium to the minimum intensity measured. (A) The calcium input is at a low range, almost on the range of resting calcium concentration. This calcium amount slows down the rate of AC1 and PDE1 activation by the calcium-calmodulin complex, and as a result, only a low amount of cAMP is produced. AC1 • CaM and PDE1 • CaM seem to pick up only calcium peaks, whereas these calcium dynamics seem to barely affect the cAMP and PKA dynamics over the time course of recorded calcium (4 min). (B) The second set of measured calcium in the spine shows a higher amount of calcium, which accelerates the rate of AC1 and PDE1 activation and cAMP and PKA formation. Because of the higher range of calcium oscillations in this data set, AC1 • CaM, PDE1 • CaM, and cAMP seem to be affected more by calcium transients. (C) This set of measured calcium data shows the highest recorded calcium. Because of the high range of calcium oscillations (10  $\mu\text{M}$ ), the induced calcium transients are significant in this case, and even PKA shows a subtle effect of the most prominent calcium spikes. The data are representative of  $n = 10$  neurons from three independent experiments. Representative images at the indicated time points are shown for each spine selected for analysis. Scale bars, 10  $\mu\text{m}$ . To see this figure in color, go online.

are lower (Fig. 7 C). We also chose different  $\omega_2$  values and confirmed that cAMP only picks up minute timescales (Fig. S4).

## DISCUSSION

cAMP/PKA activity triggered by  $\text{Ca}^{2+}$  is an essential biochemical pathway for synaptic plasticity, regulating spine structure, and LTP (36,116). In this study, we have developed a mathematical model, constrained by existing experimental data (Fig. 2), to simulate the dynamics of the cAMP/PKA pathway in response to calcium input. Analysis of this model allowed us to make the following predictions: first, for a given calcium input, AC1, and PDE1 kinetics reflect both the large and the small frequencies, albeit with different amplitudes; second, cAMP/PKA dynamics reflect only the small frequency of the calcium input; and finally, cAMP/PKA act as a leaky integrator of calcium because of frequency attenuation by the intermediary steps (Fig. 8). We also found that spines generated different spontaneous calcium frequencies in cultured neurons (Fig. 6), thus motivating the need to study multiple timescales. These findings have implications for cAMP/PKA signaling in den-

dritic spines in particular and neuronal signal transduction in general.

The ability to modulate the output frequency in response to a signal input is an important feature in biochemical signal transduction; it ensures robustness and noise filtering. As a result, the output signal, cAMP/PKA in this case, will respond to calcium input for strong signals but not to weak signals (Fig. 7). In general, the combination of activation and inactivation kinetics along with feedback loops, many of which oscillate, may be responsible for noise attenuation in signal regulation (117,118). Noise attenuation has a significant role in regulating biological switches. These switches must sense changes in signal concentration while buffering against signal noise (119). Our model predicts that depending on the sensitivity of regulating enzymes to  $\text{Ca}^{2+}$ , the signaling input can be modified to the desired signaling output with a different range of frequency. For example, starting with a stimulus  $\text{Ca}^{2+}$  signal with a combination of  $\omega_1$  and  $\omega_2$  oscillation frequencies, the cAMP/PKA pathway can modify the initial signal and filter it so that components downstream in the pathway such as PKA receive a signal with an oscillation frequency of  $\omega_2$  (Fig. 8).

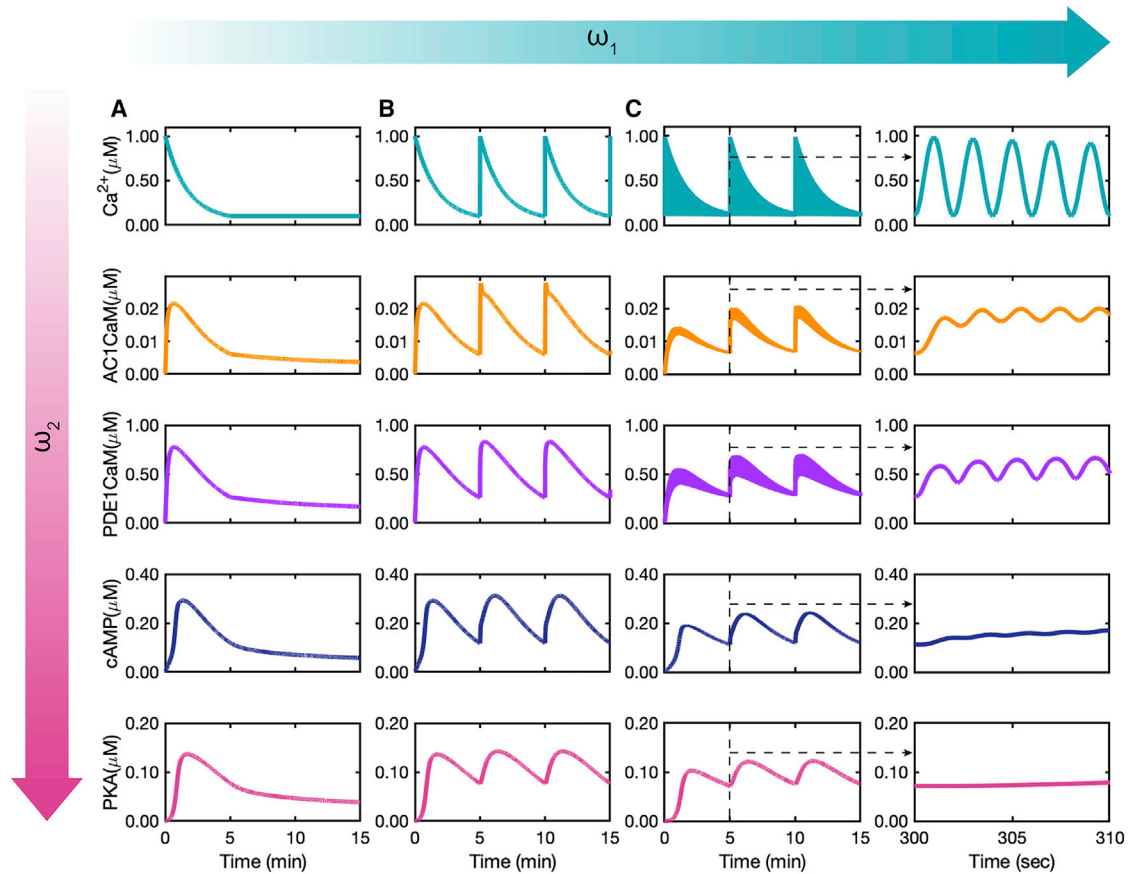

FIGURE 7 Effect of calcium stimulation patterns on AC1 · CaM, PDE1 · CaM, cAMP, and PKA dynamics: (A) nonoscillating calcium with an initial concentration of 1  $\mu\text{M}$  induces only one peak in each of AC1 · CaM, PDE1 · CaM, cAMP, and PKA. (B) Calcium bursts with exponential decays with 0.003 Hz frequency ( $\omega_2$ ) induce minute-scale oscillations in each of AC1 · CaM, PDE1 · CaM, cAMP, and PKA. (C) The combination of sinusoidal calcium oscillations of 0.5 Hz with exponential decays of 0.003 Hz induces both second-scale and minute-scale oscillations in both AC1 · CaM and PDE1 · CaM, as the plot insets show. Although cAMP barely shows a leaky oscillation on the second scale, PKA merely shows minute-scale oscillations. To see this figure in color, go online.

As a result, cAMP/PKA can be thought of as a leaky integrator of calcium signals (Fig. 5, A and B). This signal modification is important in the context of how cAMP/PKA directly impacts spine morphology (120), receptor trafficking (121), and transcription factor activation (e.g., cAMP-response element binding protein (CREB) and Exchange protein activated by cAMP (Epac)) (32,122). Although these transcription factors are not directly considered in our study, it is possible that the frequency modulation exhibited by the pathway we modeled plays a critical role in contributing to neuronal robustness to small fluctuations while retaining the ability to rapidly respond to large calcium influxes. To identify whether calcium or  $G_s$  signals dominate, we added the reactions pertaining to the  $G_s$ -mediated cAMP production (43) in our model. Interestingly, we found that the  $G_s$  pathway had very little effect on the conclusions of our model. The main reason for this is that calcium mediates both AC1 and PDE1 activation, thereby creating a strong incoherent feedforward loop for cAMP (123), whereas  $G_s$  linearly activates AC1, and PDE1 de-

pends only on PKA feedback. Of course, the addition of other feedback loops and regulatory pathways in future efforts will dissect this cross talk better.

The calcium input to our model was inspired by measurements of spontaneous calcium dynamics in dendritic spines (Fig. 6). Ideally, we would like to use imaging to simultaneously measure spontaneous calcium and cAMP/PKA activity in dendritic spines to test our model predictions. However, despite the recent developments in fluorescence biosensing methods, imaging and coimaging of multiple-second messenger, protein kinase, and phosphatase activities in micron-sized compartments remains challenging (124). This is also true for simultaneously imaging the dynamics of both cAMP and calcium in single dendritic spines (36,125). Recently, Tang et al. measured PKA activity in dendritic spines in response to glutamate uncaging using new fluorescence resonance energy transfer probes that they developed (36). The timescale of PKA dynamics from our model (Fig. 7 A) is in good agreement with the timescale of  $\sim 10$  min (Fig. 6 of Tang et al. (36)). This

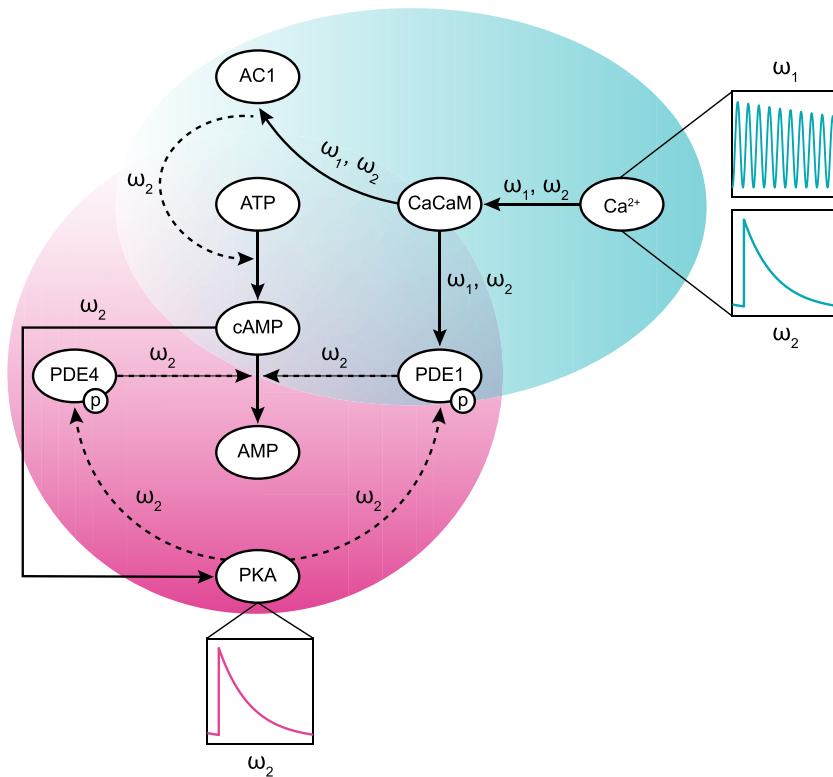

FIGURE 8 The frequency control in the modeled cAMP/PKA pathway from calcium stimulation through PKA. Calcium oscillates with a combination of frequencies ( $\omega_1 = 0.5$  Hz and  $\omega_2 = 0.003$  Hz). From the calcium-calmodulin complex activation of AC1 and PDE1 enzymes through cAMP production and degradation, the effect of  $\omega_1$  becomes trivial. Ultimately, through the downstream pathway,  $\omega_2$  remains the only significant oscillatory frequency in this pathway. To see this figure in color, go online.

indicates our developed model closely mimics reported PKA activity in subcompartments, in this case, dendritic spines.

Despite the predictive capability of our model, there are certain limitations that must be acknowledged. First, we only consider a deterministic model and have currently ignored stochastic dynamics in the system. It is possible that the frequency modulation effects presented here will be somewhat altered by including stochasticity, but we anticipate that the overall conclusions will not be affected on average if the same network is considered. An additional limitation of our work emerges in the form of challenges associated with coimaging 2 s messengers simultaneously in the same spine. We are working on developing such probes to overcome these challenges. Finally, there are indeed many protein kinases and phosphatases that affect this pathway (126–129), and ongoing efforts in our group are focused on building up increasingly comprehensive network maps of these signaling reactions. Furthermore, spatial regulations of cAMP signaling are other important factors that need to be considered (130–132). Enzyme regulation seems to play a significant role in cAMP/PKA pathway dynamics and signal filtration (133–135). These enzymes can also be localized by A-kinase anchoring proteins and change cAMP/PKA dynamics further (136–138). The effect of spine size and enzyme localizations are considered in a companion study (62).

## SUPPORTING MATERIAL

Supporting Material can be found online at <https://doi.org/10.1016/j.bpj.2019.10.003>.

## AUTHOR CONTRIBUTIONS

D.O. and P.R. conceived the study. D.O. developed the model and conducted the simulations. D.L.S. conducted neuronal culture experiments. B.C. aided in experimental design. All authors analyzed the data and wrote the manuscript.

## ACKNOWLEDGMENTS

The authors wish to thank Miriam Bell, Justin Laughlin, and Allen Leung for their valuable comments. D.L.S. thanks A. J. Slepain for her assistance with neuronal culture.

This work was supported by Air Force Office of Scientific Research Multi University Research Initiative (AFOSR MURI) grant number FA9550-18-1-0051. D.L.S. was supported by National Institutes of Health/National Cancer Institute (NCI) T32 CA009523. Confocal imaging was done at the UC San Diego Nikon Imaging Center with the assistance of Eric Griffis.

## REFERENCES

1. Nanou, E., and W. A. Catterall. 2018. Calcium channels, synaptic plasticity, and neuropsychiatric disease. *Neuron*. 98:466–481.
2. Voglis, G., and N. Tavernarakis. 2006. The role of synaptic ion channels in synaptic plasticity. *EMBO Rep.* 7:1104–1110.

3. Swilius, M. T., and M. N. Waxham. 2008. Ca<sup>2+</sup>/calmodulin-dependent protein kinases. *Cell. Mol. Life Sci.* 65:2637–2657.
4. Lledo, P. M., G. O. Hjelmstad, ..., R. A. Nicoll. 1995. Calcium/calmodulin-dependent kinase II and long-term potentiation enhance synaptic transmission by the same mechanism. *Proc. Natl. Acad. Sci. USA.* 92:11175–11179.
5. Cammarota, M., L. R. Bevilacqua, ..., J. H. Medina. 2002. Participation of CaMKII in neuronal plasticity and memory formation. *Cell. Mol. Neurobiol.* 22:259–267.
6. Hilfiker, S., A. J. Czernik, ..., G. J. Augustine. 2001. Tonic active protein kinase A regulates neurotransmitter release at the squid giant synapse. *J. Physiol.* 531:141–146.
7. Liu, Z., L. Geng, ..., Z. Xie. 2003. Frequency modulation of synchronized Ca<sup>2+</sup> spikes in cultured hippocampal networks through G-protein-coupled receptors. *J. Neurosci.* 23:4156–4163.
8. Fiumara, F., S. Giovedì, ..., M. Ghirardi. 2004. Phosphorylation by cAMP-dependent protein kinase is essential for synapsin-induced enhancement of neurotransmitter release in invertebrate neurons. *J. Cell Sci.* 117:5145–5154.
9. Giese, K. P., and K. Mizuno. 2013. The roles of protein kinases in learning and memory. *Learn. Mem.* 20:540–552.
10. Otmakhov, N., L. C. Griffith, and J. E. Lisman. 1997. Postsynaptic inhibitors of calcium/calmodulin-dependent protein kinase type II block induction but not maintenance of pairing-induced long-term potentiation. *J. Neurosci.* 17:5357–5365.
11. Blackwell, K. T., L. J. Wallace, ..., W. Koh. 2013. Modeling spatial aspects of intracellular dopamine signaling. *Methods Mol. Biol.* 964:61–75.
12. Kandel, E. R., Y. Dudai, and M. R. Mayford. 2014. The molecular and systems biology of memory. *Cell.* 157:163–186.
13. Bhalla, U. S., and R. Iyengar. 1999. Emergent properties of networks of biological signaling pathways. *Science.* 283:381–387.
14. Hayer, A., and U. S. Bhalla. 2005. Molecular switches at the synapse emerge from receptor and kinase traffic. *PLoS Comput. Biol.* 1:137–154.
15. Robison, A. J., M. A. Bass, ..., R. J. Colbran. 2005. Multivalent interactions of calcium/calmodulin-dependent protein kinase II with the postsynaptic density proteins NR2B, densin-180, and  $\alpha$ -actinin-2. *J. Biol. Chem.* 280:35329–35336.
16. Strack, S., S. Choi, ..., R. J. Colbran. 1997. Translocation of auto-phosphorylated calcium/calmodulin-dependent protein kinase II to the postsynaptic density. *J. Biol. Chem.* 272:13467–13470.
17. Lucić, V., G. J. Greif, and M. B. Kennedy. 2008. Detailed state model of CaMKII activation and autophosphorylation. *Eur. Biophys. J.* 38:83–98.
18. Zamora Chimal, C. G., and E. De Schutter. 2018. Ca<sup>2+</sup> requirements for long-term depression are frequency sensitive in Purkinje cells. *Front. Mol. Neurosci.* 11:438.
19. Pepke, S., T. Kinzer-Ursem, ..., M. B. Kennedy. 2010. A dynamic model of interactions of Ca<sup>2+</sup>, calmodulin, and catalytic subunits of Ca<sup>2+</sup>/calmodulin-dependent protein kinase II. *PLoS Comput. Biol.* 6:e1000675.
20. Lisman, J., R. Yasuda, and S. Raghavachari. 2012. Mechanisms of CaMKII action in long-term potentiation. *Nat. Rev. Neurosci.* 13:169–182.
21. Lisman, J. 2017. Criteria for identifying the molecular basis of the engram (CaMKII, PKMzeta). *Mol. Brain.* 10:55.
22. Graupner, M., and N. Brunel. 2007. STDP in a bistable synapse model based on CaMKII and associated signaling pathways. *PLoS Comput. Biol.* 3:e221.
23. Zaccolo, M., and T. Pozzan. 2003. cAMP and Ca<sup>2+</sup> interplay: a matter of oscillation patterns. *Trends Neurosci.* 26:53–55.
24. Dunn, T. A., C. T. Wang, ..., M. B. Feller. 2006. Imaging of cAMP levels and protein kinase A activity reveals that retinal waves drive oscillations in second-messenger cascades. *J. Neurosci.* 26:12807–12815.
25. Willoughby, D., W. Wong, ..., D. M. Cooper. 2006. An anchored PKA and PDE4 complex regulates subplasmalemmal cAMP dynamics. *EMBO J.* 25:2051–2061.
26. Halls, M. L., and D. M. Cooper. 2011. Regulation by Ca<sup>2+</sup>-signaling pathways of adenylyl cyclases. *Cold Spring Harb. Perspect. Biol.* 3:a004143.
27. Tulsian, N. K., S. Krishnamurthy, and G. S. Anand. 2017. Channeling of cAMP in PDE-PKA complexes promotes signal adaptation. *Biophys. J.* 112:2552–2566.
28. Sette, C., and M. Conti. 1996. Phosphorylation and activation of a cAMP-specific phosphodiesterase by the cAMP-dependent protein kinase. Involvement of serine 54 in the enzyme activation. *J. Biol. Chem.* 271:16526–16534.
29. Cardinale, A., and F. R. Fusco. 2018. Inhibition of phosphodiesterases as a strategy to achieve neuroprotection in Huntington's disease. *CNS Neurosci. Ther.* 24:319–328.
30. Hell, J. W. 2016. How Ca<sup>2+</sup>-permeable AMPA receptors, the kinase PKA, and the phosphatase PP2B are intertwined in synaptic LTP and LTD. *Sci. Signal.* 9:e2.
31. Batty, N. J., K. K. Fenrich, and K. Fouad. 2017. The role of cAMP and its downstream targets in neurite growth in the adult nervous system. *Neurosci. Lett.* 652:56–63.
32. Kandel, E. R. 2012. The molecular biology of memory: cAMP, PKA, CRE, CREB-1, CREB-2, and C/EBP. *Mol. Brain.* 5:14.
33. Nagai, T., J. Yoshimoto, ..., K. Kaibuchi. 2016. Phosphorylation signals in striatal medium spiny neurons. *Trends Pharmacol. Sci.* 37:858–871.
34. Tillo, S. E., W. H. Xiong, ..., H. Zhong. 2017. Liberated PKA catalytic subunits associate with the membrane via myristoylation to preferentially phosphorylate membrane substrates. *Cell Rep.* 19:617–629.
35. Zhong, H., G. M. Sia, ..., K. Svoboda. 2009. Subcellular dynamics of type II PKA in neurons. *Neuron.* 62:363–374.
36. Tang, S., and R. Yasuda. 2017. Imaging ERK and PKA activation in single dendritic spines during structural plasticity. *Neuron.* 93:1315–1324.e3.
37. Bhalla, U. S. 2002. Use of kinetic and genesis for modeling signaling pathways. In *Methods in Enzymology* J. D. Hildebrandt and R. Iyengar, eds. Academic Press, pp. 3–23.
38. Bhalla, U. S. 2004. Signaling in small subcellular volumes. I. Stochastic and diffusion effects on individual pathways. *Biophys. J.* 87:733–744.
39. Lindskog, M., M. Kim, ..., J. H. Koteleski. 2006. Transient calcium and dopamine increase PKA activity and DARPP-32 phosphorylation. *PLoS Comput. Biol.* 2:e119.
40. Oliveira, R. F., A. Terrin, ..., K. T. Blackwell. 2010. The role of type 4 phosphodiesterases in generating microdomains of cAMP: large scale stochastic simulations. *PLoS One.* 5:e11725.
41. Kim, M., A. J. Park, ..., K. T. Blackwell. 2011. Colocalization of protein kinase A with adenylyl cyclase enhances protein kinase A activity during induction of long-lasting long-term-potentiation. *PLoS Comput. Biol.* 7:e1002084.
42. Oliveira, R. F., M. Kim, and K. T. Blackwell. 2012. Subcellular location of PKA controls striatal plasticity: stochastic simulations in spiny dendrites. *PLoS Comput. Biol.* 8:e1002383.
43. Chay, A., I. Zamparo, ..., K. T. Blackwell. 2016. Control of  $\beta$ AR- and N-methyl-D-aspartate (NMDA) receptor-dependent cAMP dynamics in hippocampal neurons. *PLoS Comput. Biol.* 12:e1004735.
44. Jędrzejewska-Szmek, J., S. Damodaran, ..., K. T. Blackwell. 2017. Calcium dynamics predict direction of synaptic plasticity in striatal spiny projection neurons. *Eur. J. Neurosci.* 45:1044–1056.
45. Sakai, N., M. Yamada, ..., H. Hatanaka. 1997. BDNF potentiates spontaneous Ca<sup>2+</sup> oscillations in cultured hippocampal neurons. *Brain Res.* 778:318–328.

46. Salazar, C., A. Z. Politi, and T. Höfer. 2008. Decoding of calcium oscillations by phosphorylation cycles: analytic results. *Biophys. J.* 94:1203–1215.
47. Bradshaw, J. M., Y. Kubota, ..., H. Schulman. 2003. An ultrasensitive Ca<sup>2+</sup>/calmodulin-dependent protein kinase II-protein phosphatase 1 switch facilitates specificity in postsynaptic calcium signaling. *Proc. Natl. Acad. Sci. USA.* 100:10512–10517.
48. Uhlén, P., and N. Fritz. 2010. Biochemistry of calcium oscillations. *Biochem. Biophys. Res. Commun.* 396:28–32.
49. Dupont, G., L. Combettes, ..., J. W. Putney. 2011. Calcium oscillations. *Cold Spring Harb. Perspect. Biol.* 3:a004226.
50. Smedler, E., and P. Uhlen. 2014. Frequency decoding of calcium oscillations. *Biochim. Biophys. Acta.* 1840:964–969.
51. Sneyd, J., J. M. Han, ..., D. I. Yule. 2017. On the dynamical structure of calcium oscillations. *Proc. Natl. Acad. Sci. USA.* 114:1456–1461.
52. O'Neill, J. S., and A. B. Reddy. 2012. The essential role of cAMP/Ca<sup>2+</sup> signalling in mammalian circadian timekeeping. *Biochem. Soc. Trans.* 40:44–50.
53. Ujita, S., T. Sasaki, ..., Y. Ikegaya. 2017. cAMP-dependent calcium oscillations of astrocytes: an implication for pathology. *Cereb. Cortex.* 27:1602–1614.
54. Siso-Nadal, F., J. J. Fox, ..., P. S. Swain. 2009. Cross-talk between signaling pathways can generate robust oscillations in calcium and cAMP. *PLoS One.* 4:e7189.
55. Chen, X., N. L. Rochefort, ..., A. Konnerth. 2013. Reactivation of the same synapses during spontaneous up states and sensory stimuli. *Cell Rep.* 4:31–39.
56. De Koninck, P., and H. Schulman. 1998. Sensitivity of CaM kinase II to the frequency of Ca<sup>2+</sup> oscillations. *Science.* 279:227–230.
57. Dupont, G., G. Houart, and P. De Koninck. 2003. Sensitivity of CaM kinase II to the frequency of Ca<sup>2+</sup> oscillations: a simple model. *Cell Calcium.* 34:485–497.
58. Li, L., M. Lai, ..., C. Proctor. 2019. Neurogranin stimulates Ca<sup>2+</sup>/calmodulin-dependent kinase II by inhibiting calcineurin at specific calcium spike frequencies. *bioRxiv* <https://doi.org/10.1101/597278>.
59. Li, L., M. I. Stefan, and N. Le Novère. 2012. Calcium input frequency, duration and amplitude differentially modulate the relative activation of calcineurin and CaMKII. *PLoS One.* 7:e43810.
60. Eshete, F., and R. D. Fields. 2001. Spike frequency decoding and autonomous activation of Ca<sup>2+</sup>-calmodulin-dependent protein kinase II in dorsal root ganglion neurons. *J. Neurosci.* 21:6694–6705.
61. Yasuda, R. 2012. Studying signal transduction in single dendritic spines. *Cold Spring Harb. Perspect. Biol.* 4:a005611.
62. Ohadi, D., and P. Rangamani. 2019. Geometric control of frequency modulation of cAMP oscillations due to Ca<sup>2+</sup>-bursts in dendritic spines. *bioRxiv* <https://doi.org/10.1101/520643>.
63. Gorbunova, Y. V., and N. C. Spitzer. 2002. Dynamic interactions of cyclic AMP transients and spontaneous Ca(2+) spikes. *Nature.* 418:93–96.
64. Masada, N., S. Schaks, ..., D. M. Cooper. 2012. Distinct mechanisms of calmodulin binding and regulation of adenylyl cyclases 1 and 8. *Biochemistry.* 51:7917–7929.
65. Goraya, T. A., and D. M. Cooper. 2005. Ca<sup>2+</sup>-calmodulin-dependent phosphodiesterase (PDE1): current perspectives. *Cell. Signal.* 17:789–797.
66. Hoops, S., S. Sahle, ..., U. Kummer. 2006. COPASI—a COMplex PATHway SIMulator. *Bioinformatics.* 22:3067–3074.
67. Wong, S. T., J. Athos, ..., D. R. Storm. 1999. Calcium-stimulated adenylyl cyclase activity is critical for hippocampus-dependent long-term memory and late phase LTP. *Neuron.* 23:787–798.
68. Klein, C., R. K. Sunahara, ..., A. C. Howlett. 2002. Zinc inhibition of cAMP signaling. *J. Biol. Chem.* 277:11859–11865.
69. Sharma, R. K., and J. H. Wang. 1986. Regulation of cAMP concentration by calmodulin-dependent cyclic nucleotide phosphodiesterase. *Biochem. Cell Biol.* 64:1072–1080.
70. Sharma, R. K., and J. Kalra. 1994. Characterization of calmodulin-dependent cyclic nucleotide phosphodiesterase isoenzymes. *Biochem. J.* 299:97–100.
71. Laliberté, F., S. Liu, ..., Z. Huang. 2002. In vitro PKA phosphorylation-mediated human PDE4A4 activation. *FEBS Lett.* 512:205–208.
72. Mons, N., A. Harry, ..., D. M. Cooper. 1995. Immunohistochemical localization of adenylyl cyclase in rat brain indicates a highly selective concentration at synapses. *Proc. Natl. Acad. Sci. USA.* 92:8473–8477.
73. Goraya, T. A., N. Masada, ..., D. M. Cooper. 2004. Sustained entry of Ca<sup>2+</sup> is required to activate Ca<sup>2+</sup>-calmodulin-dependent phosphodiesterase 1A. *J. Biol. Chem.* 279:40494–40504.
74. Rochefort, N. L., and A. Konnerth. 2012. Dendritic spines: from structure to in vivo function. *EMBO Rep.* 13:699–708.
75. Yasuda, R. 2017. Biophysics of biochemical signaling in dendritic spines: implications in synaptic plasticity. *Biophys. J.* 113:2152–2159.
76. Zhang, M., C. Abrams, ..., J. F. Zhang. 2012. Structural basis for calmodulin as a dynamic calcium sensor. *Structure.* 20:911–923.
77. Means, A. R. 1994. Calcium, calmodulin and cell cycle regulation. *FEBS Lett.* 347:1–4.
78. Faas, G. C., S. Raghavachari, ..., I. Mody. 2011. Calmodulin as a direct detector of Ca<sup>2+</sup> signals. *Nat. Neurosci.* 14:301–304.
79. Halling, D. B., B. J. Liebeskind, ..., R. W. Aldrich. 2016. Conserved properties of individual Ca<sup>2+</sup>-binding sites in calmodulin. *Proc. Natl. Acad. Sci. USA.* 113:E1216–E1225.
80. Lai, M., D. Brun, ..., N. Le Novère. 2015. Modulation of calmodulin lobes by different targets: an allosteric model with hemicongruent conformational transitions. *PLoS Comput. Biol.* 11:e1004063.
81. Sorensen, A. B., M. T. Søndergaard, and M. T. Overgaard. 2013. Calmodulin in a heartbeat. *FEBS J.* 280:5511–5532.
82. Valejev, N. V., D. G. Bates, ..., N. V. Kotov. 2008. Elucidating the mechanisms of cooperative calcium-calmodulin interactions: a structural systems biology approach. *BMC Syst. Biol.* 2:48.
83. Chan, G. C., S. Tonegawa, and D. R. Storm. 2005. Hippocampal neurons express a calcineurin-activated adenylyl cyclase. *J. Neurosci.* 25:9913–9918.
84. Wayman, G. A., S. Impey, ..., D. R. Storm. 1994. Synergistic activation of the type I adenylyl cyclase by Ca<sup>2+</sup> and Gs-coupled receptors in vivo. *J. Biol. Chem.* 269:25400–25405.
85. Cooper, D. M., N. Mons, and J. W. Karpen. 1995. Adenylyl cyclases and the interaction between calcium and cAMP signalling. *Nature.* 374:421–424.
86. Antunes, G., A. C. Roque, and F. M. Simoes de Souza. 2016. Modeling intracellular competition for calcium: kinetic and thermodynamic control of different molecular modes of signal decoding. *Sci. Rep.* 6:23730.
87. Willoughby, D., and D. M. Cooper. 2007. Organization and Ca<sup>2+</sup> regulation of adenylyl cyclases in cAMP microdomains. *Physiol. Rev.* 87:965–1010.
88. N. J. Brandon and A. R. West, eds 2014. Cyclic-Nucleotide Phosphodiesterases in the Central Nervous System John Wiley & Sons, Inc, Hoboken, NJ.
89. Kakkar, R., R. V. Raju, and R. K. Sharma. 1999. Calmodulin-dependent cyclic nucleotide phosphodiesterase (PDE1). *Cell. Mol. Life Sci.* 55:1164–1186.
90. Sharma, R. K. 2003. Diversity of calcium action in regulation of mammalian calmodulin-dependent cyclic nucleotide phosphodiesterase. *Indian J. Biochem. Biophys.* 40:77–91.
91. H.-T. Zhang, Y. Xu, and J. M. O'Donnell, eds 2017. Phosphodiesterases: CNS Functions and Diseases, vol. 17 of Advances in Neurobiology Springer International Publishing, Cham, Switzerland.



92. Sharma, R. K., S. B. Das, ..., A. Shrivastav. 2006. Regulation of calmodulin-stimulated cyclic nucleotide phosphodiesterase (PDE1): review. *Int. J. Mol. Med.* 18:95–105.
93. Fourcaudot, E., F. Gambino, ..., A. Lüthi. 2008. cAMP/PKA signaling and RIM1alpha mediate presynaptic LTP in the lateral amygdala. *Proc. Natl. Acad. Sci. USA.* 105:15130–15135.
94. Tzounopoulos, T., R. Janz, ..., R. C. Malenka. 1998. A role for cAMP in long-term depression at hippocampal mossy fiber synapses. *Neuron.* 21:837–845.
95. Roberson, E. D., and J. D. Sweatt. 1996. Transient activation of cyclic AMP-dependent protein kinase during hippocampal long-term potentiation. *J. Biol. Chem.* 271:30436–30441.
96. Abel, T., and P. V. Nguyen. 2008. Regulation of hippocampus-dependent memory by cyclic AMP-dependent protein kinase. *Prog. Brain Res.* 169:97–115.
97. Levin, L. R., and R. R. Reed. 1995. Identification of functional domains of adenylyl cyclase using in vivo chimeras. *J. Biol. Chem.* 270:7573–7579.
98. DiRocco, D. P., Z. S. Scheiner, ..., D. R. Storm. 2009. A role for calmodulin-stimulated adenylyl cyclases in cocaine sensitization. *J. Neurosci.* 29:2393–2403.
99. Walker-Gray, R., F. Stengel, and M. G. Gold. 2017. Mechanisms for restraining cAMP-dependent protein kinase revealed by subunit quantitation and cross-linking approaches. *Proc. Natl. Acad. Sci. USA.* 114:10414–10419.
100. Gibson, R. M., Y. Ji-Buechler, and S. S. Taylor. 1997. Interaction of the regulatory and catalytic subunits of cAMP-dependent protein kinase. Electrostatic sites on the type Ialpha regulatory subunit. *J. Biol. Chem.* 272:16343–16350.
101. Kulasiri, D., and Y. He. 2017. Computational Systems Biology of Synaptic Plasticity: Modelling of Biochemical Pathways Related to Memory Formation and Impairment, vol. 10 of Series on Advances in Bioinformatics and Computational Biology. World Scientific (Europe), London, UK.
102. Zhang, P., E. V. Smith-Nguyen, ..., S. S. Taylor. 2012. Structure and allostery of the PKA RII $\beta$  tetrameric holoenzyme. *Science.* 335:712–716.
103. Raman, I. M., G. Tong, and C. E. Jahr. 1996.  $\beta$ -adrenergic regulation of synaptic NMDA receptors by cAMP-dependent protein kinase. *Neuron.* 16:415–421.
104. Gereau, R. W., IV, and P. J. Conn. 1994. A cyclic AMP-dependent form of associative synaptic plasticity induced by coactivation of beta-adrenergic receptors and metabotropic glutamate receptors in rat hippocampus. *J. Neurosci.* 14:3310–3318.
105. Iyengar, R. 1993. Molecular and functional diversity of mammalian Gs-stimulated adenylyl cyclases. *FASEB J.* 7:768–775.
106. Petzold, L. 1983. Automatic selection of methods for solving stiff and nonstiff systems of ordinary differential equations. *SIAM J. Sci. Statist. Comput.* 4:136–148.
107. Mendes, P., S. Hoops, ..., U. Kummer. 2009. Computational modeling of biochemical networks using COPASI. *Methods. Mol. Biol.* 500:17–59.
108. Fogel, D. B. 1999. An Overview of Evolutionary Programming. Springer, New York, NY, pp. 89–109.
109. Baeck, T., D. B. Fogel, and Z. Michalewicz. 1997. Handbook of Evolutionary Computation. Institute of Physics Publishing, Bristol, UK.
110. Baeck, T., and H.-P. Schwefel. 1993. An overview of evolutionary algorithms for parameter optimization. *Evol. Comput.* 1:1–23.
111. Sahle, S., P. Mendes, ..., U. Kummer. 2008. A new strategy for assessing sensitivities in biochemical models. *Philos. Trans. A Math Phys. Eng. Sci.* 366:3619–3631.
112. Cannon, R. C., C. O'Donnell, and M. F. Nolan. 2010. Stochastic ion channel gating in dendritic neurons: morphology dependence and probabilistic synaptic activation of dendritic spikes. *PLoS Comput. Biol.* 6:e1000886.
113. Baker, L. P., M. D. Nielsen, ..., D. R. Storm. 1998. Stimulation of type 1 and type 8 Ca<sup>2+</sup>/calmodulin-sensitive adenylyl cyclases by the Gs-coupled 5-hydroxytryptamine subtype 5-HT<sub>7A</sub> receptor. *J. Biol. Chem.* 273:17469–17476.
114. van Pelt, J., I. Vajda, ..., G. J. Ramakers. 2005. Dynamics and plasticity in developing neuronal networks in vitro. *Prog. Brain Res.* 147:171–188.
115. Chen, T. W., T. J. Wardill, ..., D. S. Kim. 2013. Ultrasensitive fluorescent proteins for imaging neuronal activity. *Nature.* 499:295–300.
116. Murphy, D. D., and M. Segal. 1997. Morphological plasticity of dendritic spines in central neurons is mediated by activation of cAMP response element binding protein. *Proc. Natl. Acad. Sci. USA.* 94:1482–1487.
117. Wang, L., J. Xin, and Q. Nie. 2010. A critical quantity for noise attenuation in feedback systems. *PLoS Comput. Biol.* 6:e1000764.
118. Brandman, O., and T. Meyer. 2008. Feedback loops shape cellular signals in space and time. *Science.* 322:390–395.
119. Chen, M., L. Wang, ..., Q. Nie. 2013. Noise attenuation in the ON and OFF states of biological switches. *ACS Synth. Biol.* 2:587–593.
120. Zhang, X. L., B. Pöschel, ..., P. Mundel. 2013. Essential role for synaptopodin in dendritic spine plasticity of the developing hippocampus. *J. Neurosci.* 33:12510–12518.
121. Loebrich, S., B. Djukic, ..., E. Nedivi. 2013. Regulation of glutamate receptor internalization by the spine cytoskeleton is mediated by its PKA-dependent association with CPG2. *Proc. Natl. Acad. Sci. USA.* 110:E4548–E4556.
122. Delghandi, M. P., M. Johannessen, and U. Moens. 2005. The cAMP signalling pathway activates CREB through PKA, p38 and MSK1 in NIH 3T3 cells. *Cell. Signal.* 17:1343–1351.
123. Zhang, C., R. Tsoi, ..., L. You. 2016. Processing oscillatory signals by incoherent feedforward loops. *PLoS Comput. Biol.* 12:e1005101.
124. Hackley, C. R., E. O. Mazzoni, and J. Blau. 2018. cAMP<sub>r</sub>: a single-wavelength fluorescent sensor for cyclic AMP. *Sci. Signal.* 11:eah3738.
125. Ohta, Y., T. Furuta, ..., K. Horikawa. 2018. Red fluorescent cAMP indicator with increased affinity and expanded dynamic range. *Sci. Rep.* 8:1866.
126. Coghlan, V. M., B. A. Perrino, ..., J. D. Scott. 1995. Association of protein kinase A and protein phosphatase 2B with a common anchoring protein. *Science.* 267:108–111.
127. Vanhoose, A. M., and D. G. Winder. 2003. NMDA and beta1-adrenergic receptors differentially signal phosphorylation of glutamate receptor type 1 in area CA1 of hippocampus. *J. Neurosci.* 23:5827–5834.
128. Woolfrey, K. M., and M. L. Dell'Acqua. 2015. Coordination of protein phosphorylation and dephosphorylation in synaptic plasticity. *J. Biol. Chem.* 290:28604–28612.
129. Wang, H., and R. Y. Peng. 2016. Basic roles of key molecules connected with NMDAR signaling pathway on regulating learning and memory and synaptic plasticity. *Mil. Med. Res.* 3:26.
130. Neves, S. R., P. Tsokas, ..., R. Iyengar. 2008. Cell shape and negative links in regulatory motifs together control spatial information flow in signaling networks. *Cell.* 133:666–680.
131. Zaccolo, M. 2011. Spatial control of cAMP signalling in health and disease. *Curr. Opin. Pharmacol.* 11:649–655.
132. Cowan, A. E., I. I. Moraru, ..., L. M. Loew. 2012. Spatial modeling of cell signaling networks. *Methods Cell Biol.* 110:195–221.
133. Houslay, M. D., and D. R. Adams. 2003. PDE4 cAMP phosphodiesterases: modular enzymes that orchestrate signalling cross-talk, desensitization and compartmentalization. *Biochem. J.* 370:1–18.
134. Cooper, D. M. 2003. Regulation and organization of adenylyl cyclases and cAMP. *Biochem. J.* 375:517–529.

135. De Arcangelis, V., S. Liu, ..., Y. K. Xiang. 2010. Equilibrium between adenylyl cyclase and phosphodiesterase patterns adrenergic agonist dose-dependent spatiotemporal cAMP/protein kinase A activities in cardiomyocytes. *Mol. Pharmacol.* 78:340–349.
136. Dessauer, C. W. 2009. Adenylyl cyclase–A-kinase anchoring protein complexes: the next dimension in cAMP signaling. *Mol. Pharmacol.* 76:935–941.
137. Kapiloff, M. S., M. Rigatti, and K. L. Dodge-Kafka. 2014. Architectural and functional roles of A kinase-anchoring proteins in cAMP microdomains. *J. Gen. Physiol.* 143:9–15.
138. Gorshkov, K., S. Mehta, ..., J. Zhang. 2017. AKAP-mediated feedback control of cAMP gradients in developing hippocampal neurons. *Nat. Chem. Biol.* 13:425–431.

**Biophysical Journal, Volume 117**

**Supplemental Information**

**Computational Modeling Reveals Frequency Modulation of Calcium-cAMP/PKA Pathway in Dendritic Spines**

**Donya Ohadi, Danielle L. Schmitt, Barbara Calabrese, Shelley Halpain, Jin Zhang, and Padmini Rangamani**

## Reaction kinetic type selection for PDE1 activation

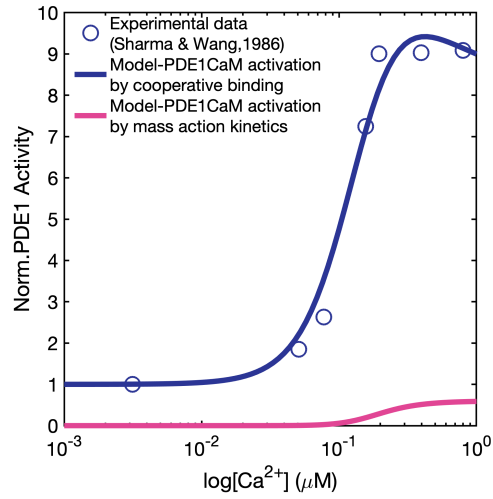

Figure S1: Cooperative binding kinetics shows a better fit for PDE1 activation by  $\text{Ca}^{2+}$  in comparison to mass-action kinetics.

## Stochastic vs Deterministic Simulations

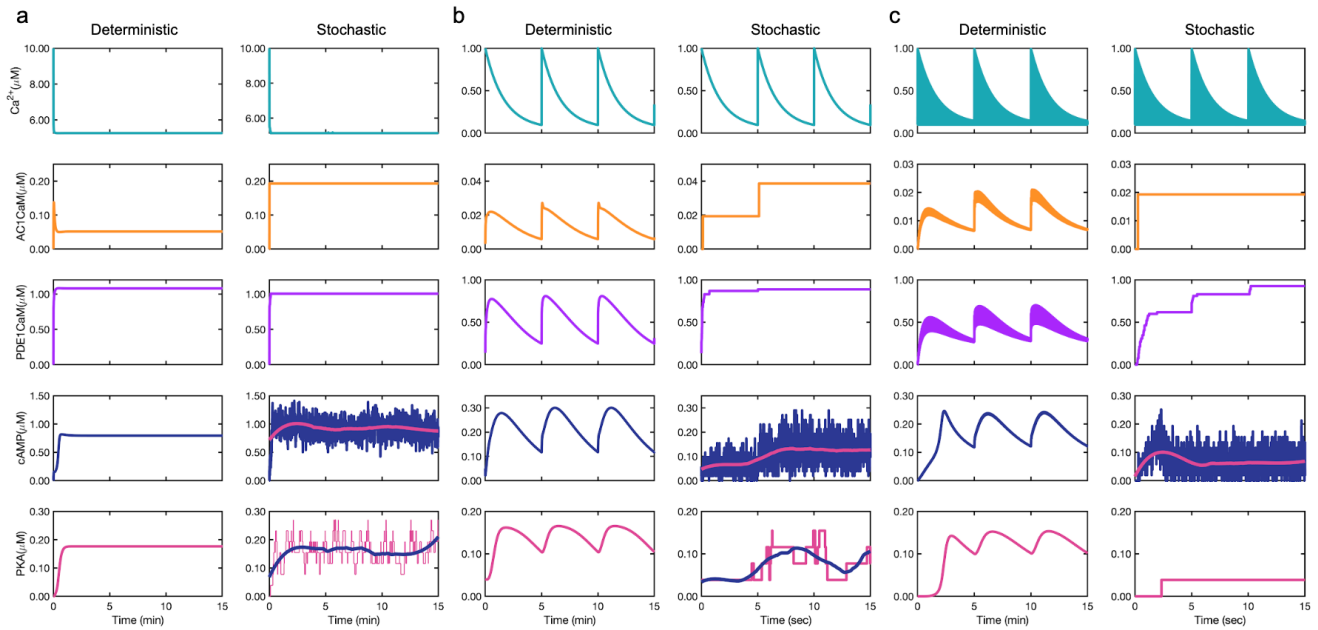

Figure S2: Comparison of stochastic and deterministic simulations for a) Non-oscillating  $\text{Ca}^{2+}$ , b)  $\text{Ca}^{2+}$  oscillating in minute scale, and c)  $\text{Ca}^{2+}$  oscillating in second scale.

## Effect of AC1 activation by $G_s$ on cAMP production

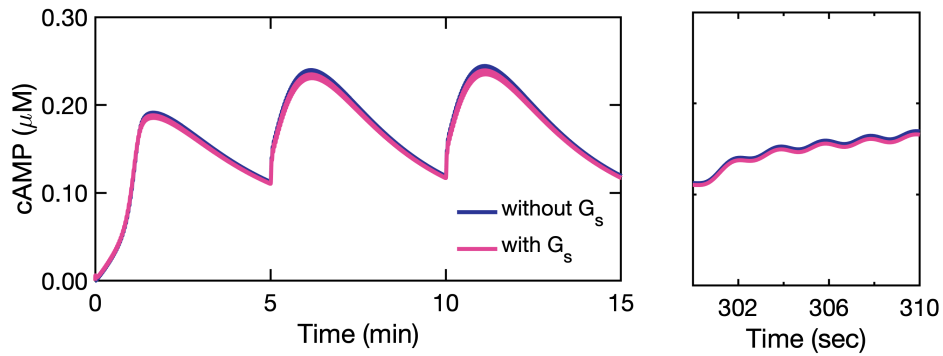

Figure S3: AC1 activation by  $G_s$  does not affect cAMP production.

## Other oscillation frequencies

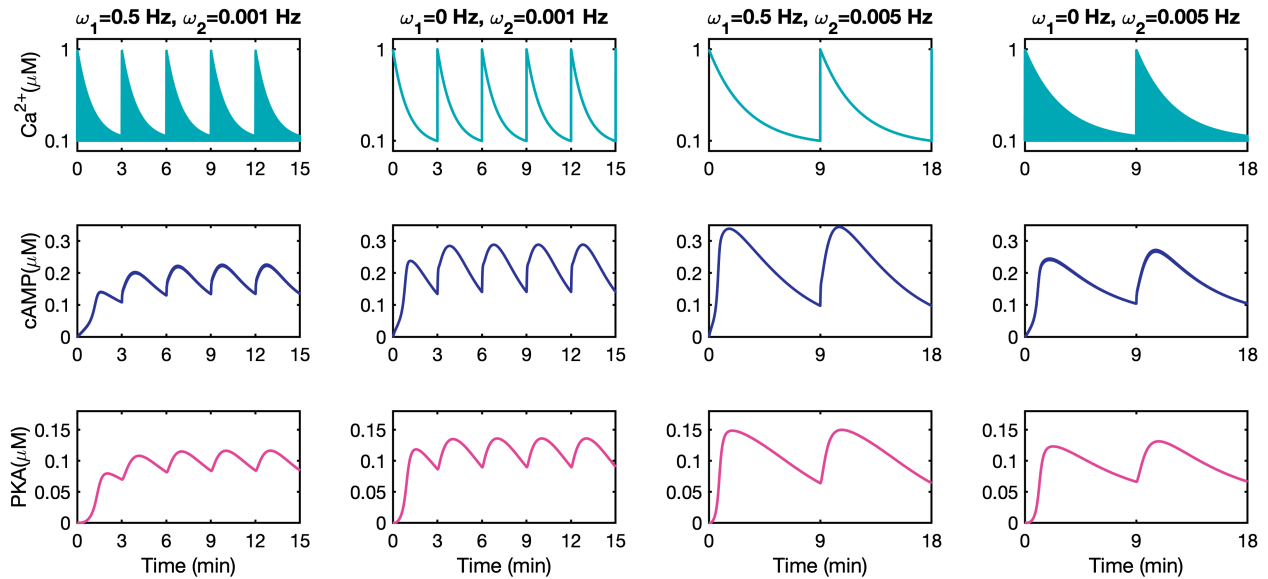

Figure S4: Two other calcium minute-scale frequencies ( $\omega_2=0.001$  and  $\omega_2=0.005$ ) along with second-scale oscillations ( $\omega_1=0.5$ ) were chosen to confirm that cAMP and PKA only pick up minute-scale oscillations of calcium.
